# Supplementary material for: Implementing an allied health team intervention to improve the care of older adults in the emergency department: protocol for a process evaluation
Source: PubMed Central journal article supplement — BMJ Open. 2019 Jul 16;9(7):e032645. doi: 10.1136/bmjopen-2019-032645 (PMC6661884; doi:10.1136/bmjopen-2019-032645), 2019-07-16
Supplement: bmjopen-2019-032645.draft_revisions.pdf [file bmjopen-2019-032645.draft_revisions.pdf]

# BMJ Open

BMJ Open is committed to open peer review. As part of this commitment we make the peer review history of every article we publish publicly available.

When an article is published we post the peer reviewers' comments and the authors' responses online. We also post the versions of the paper that were used during peer review. These are the versions that the peer review comments apply to.

The versions of the paper that follow are the versions that were submitted during the peer review process. They are not the versions of record or the final published versions. They should not be cited or distributed as the published version of this manuscript.

BMJ Open is an open access journal and the full, final, typeset and author-corrected version of record of the manuscript is available on our site with no access controls, subscription charges or pay-per-view fees (<http://bmjopen.bmj.com>).

If you have any questions on BMJ Open's open peer review process please email [info.bmjopen@bmj.com](mailto:info.bmjopen@bmj.com)

# BMJ Open

## Implementing an Allied Health Team Intervention to Improve the Care of Older Adults in the Emergency Department: Protocol for a Process Evaluation

|                               |                                                                                                                                                                                                                                                                                                                                                                                                                                                                                                                                                                                                                                                                                                                                                                                                                                                                                                                                                                                                                                                                                                                                  |
|-------------------------------|----------------------------------------------------------------------------------------------------------------------------------------------------------------------------------------------------------------------------------------------------------------------------------------------------------------------------------------------------------------------------------------------------------------------------------------------------------------------------------------------------------------------------------------------------------------------------------------------------------------------------------------------------------------------------------------------------------------------------------------------------------------------------------------------------------------------------------------------------------------------------------------------------------------------------------------------------------------------------------------------------------------------------------------------------------------------------------------------------------------------------------|
| Journal:                      | <i>BMJ Open</i>                                                                                                                                                                                                                                                                                                                                                                                                                                                                                                                                                                                                                                                                                                                                                                                                                                                                                                                                                                                                                                                                                                                  |
| Manuscript ID                 | bmjopen-2019-032645                                                                                                                                                                                                                                                                                                                                                                                                                                                                                                                                                                                                                                                                                                                                                                                                                                                                                                                                                                                                                                                                                                              |
| Article Type:                 | Protocol                                                                                                                                                                                                                                                                                                                                                                                                                                                                                                                                                                                                                                                                                                                                                                                                                                                                                                                                                                                                                                                                                                                         |
| Date Submitted by the Author: | 28-Jun-2019                                                                                                                                                                                                                                                                                                                                                                                                                                                                                                                                                                                                                                                                                                                                                                                                                                                                                                                                                                                                                                                                                                                      |
| Complete List of Authors:     | <p>Cassarino, Marica; University of Limerick Faculty of Education and Health Sciences, School of Allied Health</p> <p>Cronin, Una; University Hospital Limerick, Retrieval, Emergency and Disaster Medicine Research and Development Unit (REDSPoT)</p> <p>Robinson, Katie; University of Limerick Faculty of Education and Health Sciences, School of Allied Health</p> <p>Quinn, Rosie; Our Lady of Lourdes Hospital, Emergency Department</p> <p>Boland, Fiona; Royal College of Surgeons Ireland, 123 St Stephens Green, HRB Centre For Primary Care Research, Division of Population Health Sciences (PHS)</p> <p>Ward, Marie; Trinity College Dublin, School of Psychology</p> <p>MacNamara, Rosa; St. Vincent's University Hospital, Emergency Department</p> <p>O'Connor, Margaret; UHL,</p> <p>McCarthy, Gerard; Cork University Hospital, Emergency Department</p> <p>Ryan, Damien; University Hospital Limerick, Retrieval, Emergency and Disaster Medicine Research and Development Unit (REDSPoT)</p> <p>Galvin, Rose; University of Limerick Faculty of Education and Health Sciences, School of Allied Health</p> |
| Keywords:                     | Allied health, Emergency department, Process evaluation, Implementation, Interdisciplinary care, Health service delivery                                                                                                                                                                                                                                                                                                                                                                                                                                                                                                                                                                                                                                                                                                                                                                                                                                                                                                                                                                                                         |
|                               |                                                                                                                                                                                                                                                                                                                                                                                                                                                                                                                                                                                                                                                                                                                                                                                                                                                                                                                                                                                                                                                                                                                                  |

SCHOLARONE™  
Manuscripts

1  
2  
3           **Title:** Implementing an Allied Health Team Intervention to Improve the Care of Older  
4  
5           2 Adults in the Emergency Department: Protocol for a Process Evaluation  
6  
7  
8  
9           3

10  
11           4           **Authors:** Marica Cassarino<sup>1</sup>, Úna Cronin<sup>2</sup>, Katie Robinson<sup>1</sup>, Rosie Quinn<sup>3</sup>, Fiona  
12  
13           5 Boland<sup>4</sup>, Marie E. Ward<sup>5</sup>, Rosa McNamara<sup>6</sup>, Margaret O'Connor<sup>7,8</sup>, Gerard McCarthy<sup>9</sup>,  
14  
15           6 Damien Ryan<sup>2,7</sup>, Rose Galvin<sup>1</sup>  
16  
17  
18  
19           7

20  
21  
22           8           **Correspondence:** Dr Marica Cassarino, marica.cassarino@ul.ie, School of Allied  
23  
24           9 Health, Faculty of Education and Health Sciences, University of Limerick, Ireland.  
25  
26  
27  
28           10

29  
30           11           **Authors' information:**  
31

32           12           <sup>1</sup> School of Allied Health, Faculty of Education and Health Sciences, Health Research  
33  
34           13 Institute, University of Limerick, Ireland. Rose Galvin: [rose.galvin@ul.ie](mailto:rose.galvin@ul.ie); Katie Robinson:  
35  
36           14 [katie.robinson@ul.ie](mailto:katie.robinson@ul.ie)  
37  
38

39           15           <sup>2</sup> Retrieval, Emergency and Disaster Medicine Research and Development Unit  
40  
41           16 (REDSPoT), Emergency Department, University Hospital Limerick, Dooradoyle, Limerick,  
42  
43           17 Ireland; [unaAB.cronin@hse.ie](mailto:unaAB.cronin@hse.ie); [damien.ryan@hse.ie](mailto:damien.ryan@hse.ie)  
44  
45

46           18           <sup>3</sup>Emergency Department, Our Lady of Lourdes Hospital Drogheda, Ireland;  
47  
48           19 [rosie.quinn@hse.ie](mailto:rosie.quinn@hse.ie)  
49  
50

51           20           <sup>4</sup> HRB Centre for Primary Care Research, Royal College of Surgeons in Ireland,  
52  
53           21 Dublin, Ireland; [fionaboland@rcsi.ie](mailto:fionaboland@rcsi.ie)  
54

55           22           <sup>5</sup> School of Psychology, Trinity College, the University of Dublin, Dublin 2, Ireland;  
56  
57           23 [marie.ward@tcd.ie](mailto:marie.ward@tcd.ie)  
58  
59  
60

1  
2  
3 24           <sup>6</sup> Emergency Department, St. Vincent University Hospital, Dublin, Ireland;  
4

5 25   [rosamcnamara@svhg.ie](mailto:rosamcnamara@svhg.ie)  
6

7  
8 26           <sup>7</sup> Graduate Entry Medical School, Faculty of Education and Health Sciences,  
9

10 27   University of Limerick, Ireland  
11

12 28           <sup>8</sup> Department of Ageing and Therapeutics, University Hospital Limerick, Dooradoyle,  
13

14 29   Limerick, Ireland; [oconmargaret@gmail.com](mailto:oconmargaret@gmail.com)  
15

16  
17 30           <sup>9</sup> Emergency Department, Cork University Hospital, Cork, Ireland;  
18

19 31   [gerard.mccarthy@hse.ie](mailto:gerard.mccarthy@hse.ie)  
20

21 32  
22

23  
24 33  
25

26  
27 34           **Word count** (excluding title page, abstract, references, figures and tables): 2,689  
28  
29  
30  
31  
32  
33  
34  
35  
36  
37  
38  
39  
40  
41  
42  
43  
44  
45  
46  
47  
48  
49  
50  
51  
52  
53  
54  
55  
56  
57  
58  
59  
60

## 35           **ABSTRACT**

36           **Introduction:** Health and Social Care Professionals (HSCPs) have increasingly  
37 contributed to enhance the care of patients in Emergency Departments (EDs), particularly for  
38 older adults who are frequent ED attendees with significant adverse outcomes. For the first  
39 time, the effectiveness of a HSCP team intervention for older adults in the ED has been tested  
40 in a large randomised controlled trial, providing an opportunity to explore the implementation  
41 process for this type of intervention. This protocol describes a process evaluation that will to  
42 investigate the implementation, delivery and impact of an HSCP team intervention in the ED.

43           **Methods and analysis:** Using the Medical Research Council (MRC) Framework for  
44 process evaluations, we will employ a mixed-methods approach to provide a description of  
45 the process of implementation and delivery of the HSCP intervention in the ED, evaluate its  
46 fidelity, dose and reach, and explore the perceptions of key staff members in relations to the  
47 mechanisms and contexts of impact at the levels of individuals, physical environment,  
48 operations, communication and the broader hospital and healthcare system.

49           **Ethics and dissemination:** Ethical approval for this study was received from the HSE  
50 Mid-Western Regional Hospital Research Ethics Committee (Ref: 103/18). All participants  
51 will be invited to read and sign a written consent form prior to participation. The results of  
52 this review will be disseminated through publication in a peer-review journal and presented at  
53 relevant conferences.

## 52           **ARTICLE SUMMARY**

55           **Strengths and limitations of this study:**

- 1  
2  
3 57 - This is the first formal process evaluation of the implementation of a Health  
4  
5 58 and Social Care Professional team caring for older patients in the emergency  
6  
7 department.  
8 59  
9  
10 60 - The study will employ the Medical Research Council framework for process  
11  
12 61 evaluations.  
13  
14 62 - This study will adopt a mixed-methods approach and involve different  
15  
16 stakeholders to investigate the implementation, delivery and impact of the  
17 63 allied health intervention.  
18  
19 64  
20  
21 65 - Findings will provide key information for future implementations of allied  
22  
23 health teams in emergency care settings.  
24 66  
25  
26 67  
27  
28

29 68 **Keywords:** Allied health; emergency department; process evaluation;  
30  
31 69 implementation; interdisciplinary care; health service delivery.  
32  
33  
34 70  
35  
36  
37  
38  
39  
40  
41  
42  
43  
44  
45  
46  
47  
48  
49  
50  
51  
52  
53  
54  
55  
56  
57  
58  
59  
60

## 71 INTRODUCTION

### 72 Background

73 Complex interventions have been increasingly employed in an attempt to enhance  
74 health service delivery as well as other societal issues [1]. Randomised controlled trials  
75 (RCTs) are traditionally considered as the reference standard for establishing the  
76 effectiveness of interventions [1,2]. Recent efforts have been made to include process  
77 evaluations as a core component of investigations of effectiveness, as stated in a recent  
78 Medical Research Council (MRC) guidance document [1]. Conducting a process evaluation  
79 of an intervention, particularly in the case of complex quality improvement interventions, is  
80 important to gain a deeper understanding of the mechanisms influencing effectiveness (or  
81 lack of it), to explain discrepancies between expected and observed outcomes, to highlight  
82 the complexities of an intervention and the impact of contextual factors on outcomes, and  
83 thus to better inform implementation [2–4].

84 The MRC framework highlights three key functions of process evaluations: 1)  
85 examining the implementation process and its content (fidelity-adaptation, dose and reach);  
86 2) understanding the mechanisms of impact (participants' response to the intervention;  
87 mediators; unexpected pathways and consequences); 3) investigating the influence of the  
88 context of the intervention. Such a framework enables to capture the complexities of  
89 developing and implementing a health service intervention, so to offer useful insights for  
90 future quality improvement. In this process evaluation, we aim to use the MRC framework to  
91 evaluate the process, delivery and impact of the implementation of an allied health team-  
92 based intervention within an emergency setting.

### 93 **Intervention characteristics**

94 The present process evaluation will explore the process of implementation of the  
95 OPTIMEND intervention (i.e., “Optimising early assessment and intervention by Health and  
96 Social Care Professionals in the Emergency Department”). OPTIMEND is the first  
97 randomised controlled trial aimed to measure the impact of early assessment and intervention  
98 by a team of Health and Social Care Professionals (HSCPs) working in the Emergency  
99 Department (ED) on the quality, safety and cost-effectiveness of care for older adults, as  
100 compared to usual ED care. The HSCP team comprises of a senior physiotherapist, a senior  
101 occupational therapist, and a senior medical social worker providing functional assessment,  
102 early interventions and discharge plans to adults aged  $\geq 65$  years. A total of 354 participants  
103 were recruited in the study from December 2018 until May 2019 and randomly allocated to  
104 the HSCP intervention or ED usual care (i.e., medical team). Participants in both intervention  
105 and control groups are followed-up through telephone assessment at 30 days, four and six  
106 months after the ED index visit (ongoing until November 2019). Primary outcomes of the  
107 trial include ED length of stay and rates of hospital admissions. Secondary outcomes include  
108 function and quality of life (baseline and follow-up), satisfaction with care, ED re-visits and  
109 healthcare utilisation (follow-up), and cost-effectiveness.

110 Following the MRC framework for complex interventions [1], the design of the trial  
111 was informed by a systematic review of the existing international literature regarding the  
112 effectiveness of HSCP interventions in the ED [5]. A qualitative study was also conducted  
113 with a range of stakeholders including ED patients and their families, ED staff, HSCPs and  
114 pre-hospital staff to explore their views on the role and impact of HSCPs working in teams in  
115 the ED. A paper reporting the findings of this phase is currently in submission. We also  
116 carried out an analysis of routine observational data to describe the flow of patients who  
117 attend a large Irish ED without a dedicated HSCP team in the ED. Allied health team services



1  
2  
3 118 in the ED are routine practice in certain areas, such as in Australia [6]; however, the evidence  
4  
5 119 on the impact HSCP teams on the quality, safety and cost-effectiveness of care is limited and  
6  
7 120 heterogeneous. For this reason, there is a dearth of evaluations available on the  
8  
9  
10 121 implementation, delivery and impact of this model of care, often limited to investigations of  
11  
12 122 acceptability or patient/staff satisfaction [7–9]. The OPTIMEND is the first study  
13  
14 123 internationally to test the effectiveness an ED-based HSCP team intervention by adopting a  
15  
16  
17 124 robust methodology, thus offering the opportunity to evaluate its implementation.

### 125 **Theoretical framework**

126 The causal assumptions of the intervention and theoretical framework guiding this  
127 evaluation are outlined in the logic model presented in Figure 1, based on logic models  
128 recommended elsewhere [2,10]. A key input for the intervention came from the emergency  
129 care national priorities set by the ED taskforce within the Health Service Executive (HSE) in  
130 Ireland, which included improving workforce and interdisciplinary care in emergency  
131 settings in order to enhance patient and process outcomes [11]; following this, funding was  
132 secured for the design and implementation of an HSCP team intervention in the ED of a  
133 regional hospital in Ireland with a large catchment area, using the MRC framework for  
134 complex interventions. A synthesis of the evidence on this model of care and consultations  
135 with relevant stakeholders, as described in the previous section, informed the development of  
136 the intervention. Key assumptions of this HSCP intervention were that having a  
137 multidisciplinary team of professionals with specialised skills in the care of the older person  
138 would enhance the quality and timeliness of decision-making (ED processes), and that this  
139 would result in shorter stay for older adults as well as reduced rates of unnecessary hospital  
140 admissions (ED performance). Ultimately, it is expected that the intervention will benefit  
141 patient's health outcomes by promoting better functioning and quality of life than usual ED

1  
2  
3 142 care, higher satisfaction with the care received, and a better use of primary and community  
4  
5 143 care.  
6  
7

8 144 [FIGURE 1 HERE]  
9

10  
11 145 Figure legend: Fig. 1. HSCP intervention logic model  
12  
13

14 146  
15

### 17 147 **Objectives**

18  
19 148 Based on the characteristics and assumptions of the OPTIMEND trial, the aim of this  
20  
21  
22 149 process evaluation is to understand the functioning and effects of the OPTIMEND  
23  
24 150 intervention by examining how the intervention was delivered and received in practice. In  
25  
26 151 line with the MRC guidelines for process evaluations of complex interventions [2], the study  
27  
28 152 has the following objectives to achieve this aim:  
29  
30

- 31  
32 153 1. To describe and analyse the implementation of the OPTIMEND trial (what was  
33  
34 154 delivered and how), including an exploration of the intervention fidelity, dose and  
35  
36 155 reach;
- 37  
38 156 2. To explore the mechanisms of impact within the intervention (i.e., barriers and  
39  
40 157 facilitators of implementation in relation to participants' responses, potential  
41  
42 158 mediators and unexpected pathways);
- 43  
44 159 3. To highlight contextual influences on impact, delivery and acceptability (i.e.,  
45  
46 160 individuals, physical environment, ED processes and relations, hospital and  
47  
48 161 healthcare system).  
49

50  
51  
52  
53 162  
54  
55  
56  
57  
58  
59  
60

## 163 **METHODS AND ANALYSIS**

### 164 **Design**

165 The process evaluation will employ a mixed-methods approach to address the above  
166 objectives in relation to a HSCP intervention in the ED tested within a randomised controlled  
167 trial; the trial for which this process evaluation will be conducted is registered on  
168 ClinicalTrials.gov, NCT03739515; registered on 12<sup>th</sup> November 2018.

169 The reporting of this protocol aligns with the Standard Protocol Items for Clinical  
170 Trials (SPIRIT) guidelines [12], and a full reporting SPIRIT checklist is presented in  
171 Supplementary File 1. However, given the nature of the study (i.e., not a trial but a process  
172 evaluation), the protocol has been written by incorporating appropriate elements of the  
173 Criteria for Reporting the Development and Evaluation of Complex Interventions in  
174 Healthcare (revised guideline CReDECI 2) [13], particularly in relation to reporting the  
175 development and evaluation of the intervention. Key considerations suggested by the MRC  
176 [2] will be made in relation to the relations between the quantitative and qualitative  
177 components of the evaluation, and the relation of the process evaluation to other evaluation  
178 components (trial outcomes on clinical and cost effectiveness).

### 180 **Participants**

181 The evaluation will involve key staff members working in the hospital where the  
182 OPTIMEND intervention was carried out (University Hospital Limerick, Ireland), including  
183 the HSCPs who implemented the intervention and other staff members who worked in the ED  
184 during the OPTIMEND trial and/or contributed to the development and implementation of  
185 the intervention. Given the characteristics of the setting and the fact that the intervention was

1  
2  
3 186 conducted at one site only, it is anticipated that around 20-25 participants will complete the  
4  
5 187 study. Specifically, the following participant categories will be included in the study:

- 6  
7  
8 188 - the clinical team involved in the intervention (senior physiotherapist, senior  
9  
10 189 occupational therapist, senior medical social worker, research nurse);  
11  
12  
13 190 - ED doctors (4-5 participants),  
14  
15 191 - ED nurses (4-5 participants);  
16  
17  
18 192 - Other hospital staff members who contributed to the development and  
19  
20 193 implementation of the intervention (e.g., Informatics, Planning and Performance  
21  
22 194 Department; Departments managers; other HSCPs).

23  
24  
25 195 Participant recruitment will be conducted through convenience and snowball  
26  
27 196 sampling, with prospective participants being identified by the research team and the clinical  
28  
29 197 team involved in the intervention. The clinical team will also act as gatekeepers linking  
30  
31 198 potential participants with the researcher managing enrolment (MC); furthermore, study  
32  
33 199 leaflets will be distributed at UHL. Prospective participants will be provided with an  
34  
35 200 information sheet outlining the evaluation aim and procedure; written informed consent will  
36  
37 201 be sought prior to participation. Ethical approval for the study was received from the HSE  
38  
39 202 Mid-Western Regional Hospital Research Ethics Committee (REC 103/18) in September  
40  
41 203 2018. At the time of submission of this protocol, participants recruitment is ongoing and  
42  
43 204 expected to be completed by the end of July 2019.  
44  
45  
46  
47  
48

## 49 205 **Outcomes and Measures**

50  
51 206 Using the MRC process evaluation framework, the study will focus on the measures  
52  
53 207 and research questions outlined in Table 1. The process of implementation will be described  
54  
55 208 in terms of activities and processes put in place for the development and delivery of the  
56  
57 209 implementation, the fidelity of the intervention (adherence to protocol and evidence as well  
58  
59  
60

1  
2  
3 210 as adaptations), its dose and reach. Mechanisms internal to the intervention will be  
4  
5 211 investigated in relation to the participants' interaction with the intervention, potential  
6  
7 212 mediators and unexpected pathways. Lastly, using a system approach, potential facilitators  
8  
9 213 and barriers to implementation outside of the intervention will be explored at the level of  
10  
11 214 individuals, the ED physical environment, procedures, communication and the broader  
12  
13 215 healthcare system.  
14  
15  
16  
17  
18  
19

216

20 217 [TABLE 1 HERE. See end of manuscript]  
21  
22

218

### 26 219 **Data collection and analysis**

28  
29 220 As described in Table 1, a mix of quantitative and qualitative methods will be used to  
30  
31 221 address the objectives of this process evaluation.  
32  
33

34 222 The content and process of delivery will be evaluated quantitatively through the  
35  
36 223 intervention activity logs. The implementation will also be investigated in terms of fidelity,  
37  
38 224 dose and reach. Fidelity is a central measure in process evaluations [4] which provides  
39  
40 225 information on the extent to which the intervention was delivered as planned or adapted to a  
41  
42 226 specific context. Although maintaining appropriate levels of fidelity has been suggested to  
43  
44 227 enhance the impact of intervention [14], debates on the tension between intervention fidelity  
45  
46 228 and adaption are ongoing, translating into a variety of frameworks attempting to  
47  
48 229 conceptualise fidelity [2]. For the purpose of this process evaluation, we will use the  
49  
50 230 framework proposed by Carroll and colleagues [4] in relation to implementation fidelity for  
51  
52 231 health services interventions and the MRC guidelines [2] to integrate a quantification of  
53  
54 232 adherence, dose and reach with a qualitative exploration of mechanisms of impact within and  
55  
56 233 beyond the intervention. The trial activity logs and recruitment logs will be analysed to  
57  
58  
59  
60

1  
2  
3 234 quantify and describe the intervention delivery, comparisons will be made with the trial  
4  
5 235 protocol and evidence base (i.e., systematic review) to evaluate adherence and dose;  
6  
7 236 descriptive quantitative analyses of participants lost at follow-up will be carried to quantify  
8  
9 237 attrition. Potential modifications will be quantified and described with the help of the clinical  
10  
11 238 team using Stirman's framework for interventions adaptations [15]; a detailed evaluation  
12  
13 239 form is included in Supplementary File 2, which focuses on what was modified and at what  
14  
15 240 level of delivery, the nature of the modification, and the agents of the modification.  
16  
17  
18  
19

20 241 The qualitative elements of the implementation will be explored via semi-structured  
21  
22 242 interviews and focus groups. An interview schedule is presented in Supplementary File 3,  
23  
24 243 with questions tailored to the trial clinical team and to other staff members. The members of  
25  
26 244 the trial clinical team will be interviewed as a group to describe the process of  
27  
28 245 implementation and delivery, as well as discuss its acceptability and impact; group interviews  
29  
30 246 will also be organised with other members of staff, paying attention to capture the different  
31  
32 247 perspectives of multiple professionals. In addition, prospective participants who do not wish  
33  
34 248 or are not able to take part in the focus groups will be invited to participate in 1:1 semi-  
35  
36 249 structured interviews. Group and individual interviews have a number of strengths and  
37  
38 250 weakness which make it preferable to adopt a flexible approach [16]: On one hand, working  
39  
40 251 with a group facilitates participants who might have time restrictions or feel at ease  
41  
42 252 contributing as a member of a group; on the other hand, individual interviews provide space  
43  
44 253 to individuals who may be unwilling to contribute within a group and can help to elicit more  
45  
46 254 personal and truthful responses because removing potential biases related to group dynamics  
47  
48 255 and social desirability. The interviews and focus groups will be audio recorded and  
49  
50 256 transcribed. The data will be inputted in the software NVivo version 11 Plus (QSR  
51  
52 257 International Pty Ltd) and analysed using the six steps of thematic analysis [17,18], with the  
53  
54 258 aim to highlight the central themes related to the research questions above. While the analysis  
55  
56  
57  
58  
59  
60

1  
2  
3 259 will be data driven, the evaluation is informed by an existing framework, thus emerging  
4  
5 260 themes will be compared with the framework to evaluate fit.  
6  
7

8 261 By integrating the data collected quantitatively and qualitatively, our analysis will  
9  
10 262 focus on providing a description of the process of implementation as well as considerations of  
11  
12 263 the feasibility and acceptability of the intervention as perceived by key stakeholders involved.  
13  
14

15  
16 264 All electronic and hardcopy data will be stored safely by the research team and  
17  
18 265 retained in accordance to the data management policies and procedures of the University of  
19  
20 266 Limerick, Ireland. Access to the data will be limited to the research team members involved  
21  
22 267 in data analysis (MC, KR, RG).  
23  
24  
25

26 268

### 29 269 **Patient and public involvement statement**

30  
31 270 This process evaluation will not involve patients directly, as their perceptions of the  
32  
33 271 intervention are investigated as part of the effectiveness study (currently in progress) and it  
34  
35 272 was felt that involving patients in the process evaluation as well may cause a burden without  
36  
37 273 providing novel information. The research questions of this study were informed by the need  
38  
39 274 for quality and timeliness of assessment and intervention in the ED expressed by health  
40  
41 275 service users at a Patient and Public Involvement initiative organised by the Health Service  
42  
43 276 Executive's Advocacy Unit in Ireland ([https://www.hse.ie/eng/about/who/qid/person-family-  
44  
45 277 engagement/listening-reports/listening-report-16.pdf](https://www.hse.ie/eng/about/who/qid/person-family-engagement/listening-reports/listening-report-16.pdf)).  
46  
47  
48  
49

50 278

### 53 279 **DISCUSSION**

54  
55 280 Process evaluations have increasingly become an important component of  
56  
57 281 investigations of the effectiveness of health service interventions [1]. Despite there are  
58  
59  
60

1  
2  
3 282 encouraging studies that support the benefits of introducing HSCPs to the ED and promoting  
4  
5 283 interdisciplinary team care, the available evidence on the effectiveness of HSCP team  
6  
7 284 interventions in the ED is limited and presents heterogenous methodologies [5]. The  
8  
9 285 completion of the first randomised controlled trial testing the impact of this model of care on  
10  
11 286 patient and process outcomes in a large ED offers the opportunity to gather information on  
12  
13 287 the process of implementation, delivery and impact, particularly in relation to its feasibility  
14  
15 288 and the facilitators and barriers influencing its development, delivery and impact. Adopting  
16  
17 289 the MRC framework for process evaluations [1] will help to ensure that key aspects of the  
18  
19 290 implementation process are explored and that the complexities of the intervention are  
20  
21 291 captured in details at multiple levels (from individuals to the healthcare system); furthermore,  
22  
23 292 involving different healthcare professionals in the evaluation will enhance the richness of  
24  
25 293 information gathered, particularly in terms of the practical elements of developing and  
26  
27 294 implementing a complex intervention in a dynamic healthcare setting. While we do not  
28  
29 295 envisage any practical and operational issues arising during the study, the evaluation will be  
30  
31 296 overseen by an interdisciplinary steering group of experts in allied health and emergency care  
32  
33 297 that will ensure the rigorous conduct of the study. The findings of this process evaluation will  
34  
35 298 be integrated with the results on the clinical and cost-effectiveness of the trial (currently in  
36  
37 299 data collection status) to provide insights on the viability of this model of care and formulate  
38  
39 300 recommendations for future implementation in other emergency care settings.  
40  
41  
42  
43  
44  
45  
46  
47  
48  
49

301

## 302 **ETHICS AND DISSEMINATION**

303 Ethical approval for this study was received from the HSE Mid-Western Regional  
304 Hospital Research Ethics Committee (Ref: 103/18). All participants will be invited to read  
305 and sign a written consent form prior to participation. The results of this review will be



1  
2  
3 306 disseminated through publication in a peer-review journal and presented at relevant  
4  
5 307 conferences.

6  
7  
8 308

9  
10  
11 309 **Study status:** At the time of submission, the status of this study is currently  
12  
13 310 “Recruiting”. Recruitment for the study commenced in June 2019 and it is anticipated to be  
14  
15  
16 311 completed by the end of July 2019.

17  
18  
19 312

20  
21  
22 313 **List of abbreviations**

23  
24 314 CReDECI 2 = Criteria for Reporting the Development and Evaluation of Complex  
25  
26 315 Interventions in Healthcare version 2

27  
28  
29 316 ED = Emergency Department

30  
31  
32 317 HSCP = Health and Social Care Professional

33  
34  
35 318 HSE = Health Service Executive

36  
37  
38 319 MRC = Medical Research Council

39  
40  
41 320 OPTIMEND = Optimising early assessment and intervention by Health and Social  
42  
43 321 Care Professionals in the Emergency Department

44  
45  
46 322 SPIRIT = Standard Protocol Items: Recommendations for Interventional Trials

47  
48  
49 323 UHL = University Hospital Limerick

50  
51  
52  
53  
54  
55  
56  
57  
58  
59  
60

324 **STATEMENTS**

325 **Data statement:** Data sharing is not applicable to this article as no datasets were  
326 generated or analysed for this protocol. The qualitative data collected during the study will be  
327 stored electronically at the University of Limerick (Ireland) and be made available by the  
328 authors on request.

329 **Acknowledgements:** Not applicable

330 **Authors' contributions:** MC and RG were major contributors in writing the protocol.  
331 MC and RG designed the study. MC, RG, UC and KR participated in data collection and  
332 analysis. RQ, FB, MW, RMN, MOC, GMC and DR participated in the project design and  
333 critically appraised and edited the manuscript. RG is the guarantor of the study. All authors  
334 read and approved the final manuscript.

335 **Funding:** This research is supported by the Health Research Board of Ireland through  
336 the Research Collaborative for Quality and Patient Safety (RCQPS 2017-2). The sponsor is  
337 not involved in the design of the study and collection, analysis, interpretation of data, or in  
338 writing the manuscript.

339 **Competing interests:** The authors declare that they have no competing interests

340 **Participant consent:** All prospective participants for the study will be provided with  
341 an information sheet outlining the objectives of the study and given time to ask questions. All  
342 participants will be asked to read and sign a written consent form prior to take part.

343

344

345 **REFERENCES**

- 346 1 Craig P, Dieppe P, Macintyre S, *et al.* Developing and evaluating complex  
347 interventions: the new Medical Research Council guidance. *BMJ* 2008;**337**:a1655.  
348 doi:10.1136/bmj.a1655
- 349 2 Moore GF, Audrey S, Barker M, *et al.* Process evaluation of complex interventions:  
350 Medical Research Council guidance. *BMJ* Published Online First: 2015.  
351 doi:10.1136/bmj.h1258
- 352 3 Hulscher MEJL, Laurant MGH, Grol RPTM. Process evaluation on quality  
353 improvement interventions. *Qual Saf Heal Care* 2003;**12**:40–6.  
354 doi:10.1136/qhc.12.1.40
- 355 4 Carroll C, Patterson M, Wood S, *et al.* A conceptual framework for implementation  
356 fidelity. *Implement Sci* 2007;**2**:40. doi:10.1186/1748-5908-2-40
- 357 5 Cassarino M, Robinson K, Quinn R, *et al.* Effectiveness of early assessment and  
358 intervention by interdisciplinary teams including health and social care professionals in  
359 the emergency department: protocol for a systematic review. *BMJ Open*  
360 2018;**8**:e023464. doi:10.1136/bmjopen-2018-023464
- 361 6 Gardner G, Gardner A, Middleton S, *et al.* Mapping workforce configuration and  
362 operational models in Australian emergency departments: a national survey. *Aust Heal*  
363 *Rev* 2018;**42**:340. doi:10.1071/AH16231
- 364 7 Holmes C, Hollebon D, Scranney A, *et al.* Embedding an allied health service in the  
365 Nelson Hospital Emergency Department: A retrospective report of a six month pilot  
366 project. *New Zeal J Physiother* 2016;**44**:17–25. doi:10.15619/NZJP/44.1.03

- 1  
2  
3 367 8 Moss JE, Flower CL, Houghton LM, *et al.* A multidisciplinary Care Coordination  
4  
5 368 Team improves emergency department discharge planning practice. *Med J ...*  
6  
7 369 2002;**177**:427–31. <http://europepmc.org/abstract/MED/12381253>  
8  
9  
10 370 9 Corbett HM, Lim WK, Davis SJ, *et al.* Care coordination in the Emergency  
11  
12 371 Department: improving outcomes for older patients. *Aust Heal Rev* 2005;**29**:43–50.  
13  
14 372 doi:10.1071/AH050043  
15  
16  
17 373 10 Hasson H. Systematic evaluation of implementation fidelity of complex interventions  
18  
19 374 in health and social care. *Implement Sci* 2010;**5**:67. doi:10.1186/1748-5908-5-67  
20  
21  
22 375 11 HSE. Emergency Department Task Force. 2015.  
23  
24  
25 376 12 Chan AW, Tetzlaff JM, Altman DG, *et al.* SPIRIT 2013 statement: Defining standard  
26  
27 377 protocol items for clinical trials. *Ann. Intern. Med.* 2013. doi:10.7326/0003-4819-158-  
28  
29 378 3-201302050-00583  
30  
31  
32 379 13 Möhler R, Köpke S, Meyer G. Criteria for Reporting the Development and Evaluation  
33  
34 380 of Complex Interventions in healthcare: Revised guideline (CReDECI 2). *Trials*  
35  
36 381 2015;**16**:204. doi:10.1186/s13063-015-0709-y  
37  
38  
39 382 14 Dusenbury L, Brannigan R, Falco M, *et al.* A review of research on fidelity of  
40  
41 383 implementation: implications for drug abuse prevention in school settings. *Health*  
42  
43 384 *Educ Res* 2003;**18**:237–56. doi:10.1093/her/18.2.237  
44  
45  
46 385 15 Stirman SW, Miller CJ, Toder K, *et al.* Development of a framework and coding  
47  
48 386 system for modifications and adaptations of evidence-based interventions. *Implement*  
49  
50 387 *Sci* 2013;**8**:65. doi:10.1186/1748-5908-8-65  
51  
52  
53 388 16 Stewart DW, Shamdasani PN. *Focus groups : theory and practice.*  
54  
55 389 <https://books.google.ie/books?hl=en&lr=&id=YU0XBAAAQBAJ&oi=fnd&pg=PP1&>  
56  
57  
58  
59  
60

1  
2  
3 390 dq=focus+groups+limitations&ots=bDrREIX3Gx&sig=VtCXWwTg1L9pJBWt-  
4  
5 391 C8o8cOJNEk&redir\_esc=y#v=onepage&q=focus groups limitations&f=false  
6  
7  
8 392 (accessed 15 May 2019).  
9

10  
11 393 17 Braun V, Clarke V, Terry G. Thematic analysis. *Qual Res Clin Heal Psychol*  
12  
13 394 2012;**24**:95–114.  
14

15  
16 395 18 Braun V, Clarke V. Using thematic analysis in psychology. *Qual Res Psychol*  
17  
18 396 2006;**3**:77–101. doi:10.1191/1478088706qp063oa  
19

20  
21 397  
22  
23  
24  
25  
26  
27  
28  
29  
30  
31  
32  
33  
34  
35  
36  
37  
38  
39  
40  
41  
42  
43  
44  
45  
46  
47  
48  
49  
50  
51  
52  
53  
54  
55  
56  
57  
58  
59  
60

Table 1 – Measures, research questions and data collection

| Dimension                            | Measure                                                                                                      | Research questions                                                                                                                                                                                            | Data source                                                        | Analysis type                |
|--------------------------------------|--------------------------------------------------------------------------------------------------------------|---------------------------------------------------------------------------------------------------------------------------------------------------------------------------------------------------------------|--------------------------------------------------------------------|------------------------------|
| Implementation                       | Process                                                                                                      | How was the intervention developed and delivered?                                                                                                                                                             | Team activity logs<br>Interviews/Focus groups                      | Quantitative descriptive     |
|                                      |                                                                                                              | What inputs, resources and structures were put into place?                                                                                                                                                    |                                                                    |                              |
|                                      | Fidelity (Adherence)                                                                                         | To which extent did the intervention align or diverge from the protocol or international practice? What types of adaptations were made to fit the specific context of care delivery?                          | Trial protocol<br>Systematic review<br><br>Interviews/Focus groups | Quantitative descriptive     |
|                                      |                                                                                                              | Dose                                                                                                                                                                                                          | What was the duration, coverage and frequency of the intervention? |                              |
| Mechanisms                           | Reach                                                                                                        | What proportion of the target population (eligible patients) were enrolled in the intervention? What was the attrition rate?                                                                                  | Recruitment logs                                                   | Quantitative                 |
|                                      | Participants' responses to and interaction with intervention                                                 | How did the patients feel about being involved in the intervention?                                                                                                                                           | Interviews/Focus groups                                            | Qualitative and quantitative |
|                                      |                                                                                                              | How did other staff members feel about the intervention?                                                                                                                                                      | Data on patients' satisfaction                                     |                              |
|                                      | Mediators                                                                                                    | What aspects of the intervention influenced its implementation (people, operations, relations)?                                                                                                               | Interviews/Focus groups                                            | Qualitative                  |
| Unexpected pathways and consequences | Was there something about the intervention that was unexpected and might have influenced its implementation? | Interviews/Focus groups                                                                                                                                                                                       | Qualitative                                                        |                              |
| Context                              | Barriers and facilitators                                                                                    | What factors external to the intervention influenced its implementation and in which way? Consider multiple levels: 1) Individuals; 2) ED physical environment; 3) ED operations; 4) ED relations; 5) broader | Interviews/Focus groups                                            | Qualitative                  |

1  
2  
3  
4  
5  
6  
7  
8  
9  
10  
11  
12  
13  
14  
15  
16  
17  
18  
19  
20  
21  
22  
23  
24  
25  
26  
27  
28  
29  
30  
31  
32  
33  
34  
35  
36  
37  
38  
39  
40  
41  
42  
43  
44  
45  
46  
47  
48  
49  
50  
51  
52  
53  
54  
55  
56  
57  
58  
59  
60

hospital or healthcare  
system

---

*Notes.* Measures based on the Medical Research Council (MRC) Framework for process evaluations [1]

398

For peer review only

**OPTIMEND Logic Model**

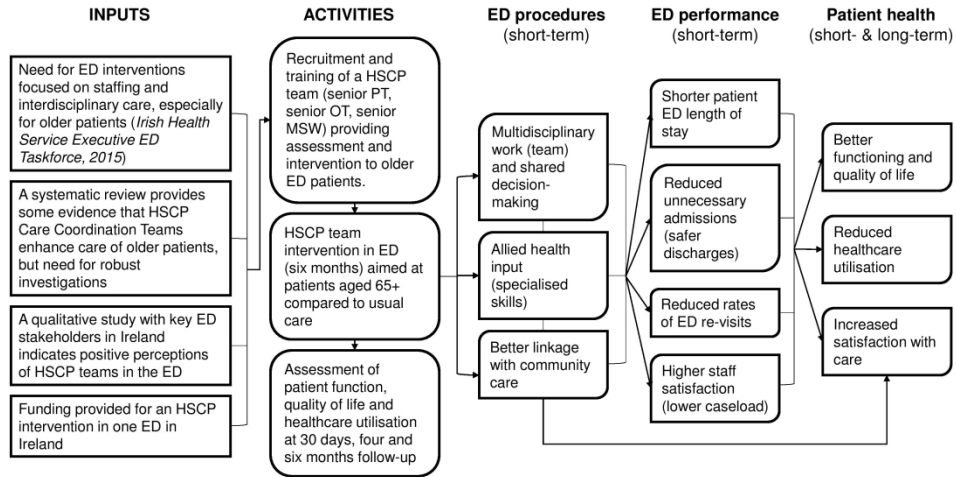

HSCP intervention logic model



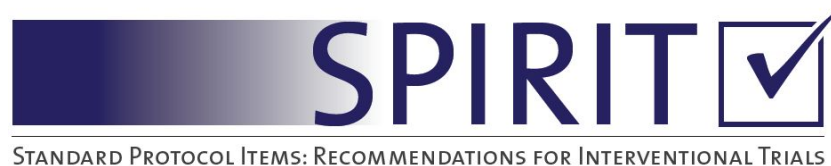

SPIRIT 2013 Checklist: Recommended items to address in a clinical trial protocol and related documents\*

| Section/item                      | Item No | Description                                                                                                                                                                                                                                                                              | Addressed on page number |
|-----------------------------------|---------|------------------------------------------------------------------------------------------------------------------------------------------------------------------------------------------------------------------------------------------------------------------------------------------|--------------------------|
| <b>Administrative information</b> |         |                                                                                                                                                                                                                                                                                          |                          |
| Title                             | 1       | Descriptive title identifying the study design, population, interventions, and, if applicable, trial acronym                                                                                                                                                                             | __ 1 __                  |
| Trial registration                | 2a      | Trial identifier and registry name. If not yet registered, name of intended registry                                                                                                                                                                                                     | __ 9 __                  |
|                                   | 2b      | All items from the World Health Organization Trial Registration Data Set                                                                                                                                                                                                                 | __ 9 __                  |
| Protocol version                  | 3       | Date and version identifier                                                                                                                                                                                                                                                              | __ NA __                 |
| Funding                           | 4       | Sources and types of financial, material, and other support                                                                                                                                                                                                                              | __ 16 __                 |
| Roles and responsibilities        | 5a      | Names, affiliations, and roles of protocol contributors                                                                                                                                                                                                                                  | __ 1-2, 16 __            |
|                                   | 5b      | Name and contact information for the trial sponsor                                                                                                                                                                                                                                       | __ 16 __                 |
|                                   | 5c      | Role of study sponsor and funders, if any, in study design; collection, management, analysis, and interpretation of data; writing of the report; and the decision to submit the report for publication, including whether they will have ultimate authority over any of these activities | __ 16 __                 |
|                                   | 5d      | Composition, roles, and responsibilities of the coordinating centre, steering committee, endpoint adjudication committee, data management team, and other individuals or groups overseeing the trial, if applicable (see Item 21a for data monitoring committee)                         | __ NA __                 |

1 **Introduction**

2

3 Background and rationale 6a Description of research question and justification for undertaking the trial, including summary of relevant studies (published and unpublished) examining benefits and harms for each intervention \_\_\_ 5-8 \_\_\_

4

5

6 6b Explanation for choice of comparators \_\_\_ NA \_\_\_

7

8 Objectives 7 Specific objectives or hypotheses \_\_\_ 8 \_\_\_

9

10 Trial design 8 Description of trial design including type of trial (eg, parallel group, crossover, factorial, single group), allocation ratio, and framework (eg, superiority, equivalence, noninferiority, exploratory) \_\_\_ 9 \_\_\_

11

12

13

14 **Methods: Participants, interventions, and outcomes**

15

16 Study setting 9 Description of study settings (eg, community clinic, academic hospital) and list of countries where data will be collected. Reference to where list of study sites can be obtained \_\_\_ 9-10 \_\_\_

17

18

19 Eligibility criteria 10 Inclusion and exclusion criteria for participants. If applicable, eligibility criteria for study centres and individuals who will perform the interventions (eg, surgeons, psychotherapists) \_\_\_ 9-10 \_\_\_

20

21

22 Interventions 11a Interventions for each group with sufficient detail to allow replication, including how and when they will be administered \_\_\_ NA \_\_\_

23

24

25 11b Criteria for discontinuing or modifying allocated interventions for a given trial participant (eg, drug dose change in response to harms, participant request, or improving/worsening disease) \_\_\_ NA \_\_\_

26

27

28 11c Strategies to improve adherence to intervention protocols, and any procedures for monitoring adherence (eg, drug tablet return, laboratory tests) \_\_\_ NA \_\_\_

29

30

31 11d Relevant concomitant care and interventions that are permitted or prohibited during the trial \_\_\_ NA \_\_\_

32

33

34 Outcomes 12 Primary, secondary, and other outcomes, including the specific measurement variable (eg, systolic blood pressure), analysis metric (eg, change from baseline, final value, time to event), method of aggregation (eg, median, proportion), and time point for each outcome. Explanation of the clinical relevance of chosen efficacy and harm outcomes is strongly recommended \_\_\_ 10-11, 20 \_\_\_

35

36

37

38

39

40 Participant timeline 13 Time schedule of enrolment, interventions (including any run-ins and washouts), assessments, and visits for participants. A schematic diagram is highly recommended (see Figure) \_\_\_ 11-13 \_\_\_

41

42

43

44

45

46

1 Sample size 14 Estimated number of participants needed to achieve study objectives and how it was determined, including \_\_\_\_\_10-11\_\_\_\_\_

2 clinical and statistical assumptions supporting any sample size calculations

3

4 Recruitment 15 Strategies for achieving adequate participant enrolment to reach target sample size \_\_\_\_\_10-11\_\_\_\_\_

5

6 **Methods: Assignment of interventions (for controlled trials)**

7

8 Allocation:

9

10 Sequence 16a Method of generating the allocation sequence (eg, computer-generated random numbers), and list of any \_\_\_\_\_NA\_\_\_\_\_

11 generation factors for stratification. To reduce predictability of a random sequence, details of any planned restriction

12 (eg, blocking) should be provided in a separate document that is unavailable to those who enrol participants

13 or assign interventions

14

15

16 Allocation 16b Mechanism of implementing the allocation sequence (eg, central telephone; sequentially numbered, \_\_\_\_\_NA\_\_\_\_\_

17 concealment opaque, sealed envelopes), describing any steps to conceal the sequence until interventions are assigned

18 mechanism

19

20 Implementation 16c Who will generate the allocation sequence, who will enrol participants, and who will assign participants to \_\_\_\_\_NA\_\_\_\_\_

21 interventions

22

23

24 Blinding (masking) 17a Who will be blinded after assignment to interventions (eg, trial participants, care providers, outcome \_\_\_\_\_NA\_\_\_\_\_

25 assessors, data analysts), and how

26

27 17b If blinded, circumstances under which unblinding is permissible, and procedure for revealing a participant's \_\_\_\_\_NA\_\_\_\_\_

28 allocated intervention during the trial

29

30

31 **Methods: Data collection, management, and analysis**

32

33 Data collection 18a Plans for assessment and collection of outcome, baseline, and other trial data, including any related \_\_\_\_\_11-13\_\_\_\_\_

34 methods processes to promote data quality (eg, duplicate measurements, training of assessors) and a description of

35 study instruments (eg, questionnaires, laboratory tests) along with their reliability and validity, if known.

36 Reference to where data collection forms can be found, if not in the protocol

37

38

39 18b Plans to promote participant retention and complete follow-up, including list of any outcome data to be \_\_\_\_\_NA\_\_\_\_\_

40 collected for participants who discontinue or deviate from intervention protocols

41

42

|    |                                 |     |                                                                                                                                                                                                                                                                                                                                       |                   |
|----|---------------------------------|-----|---------------------------------------------------------------------------------------------------------------------------------------------------------------------------------------------------------------------------------------------------------------------------------------------------------------------------------------|-------------------|
| 1  | Data management                 | 19  | Plans for data entry, coding, security, and storage, including any related processes to promote data quality (eg, double data entry; range checks for data values). Reference to where details of data management procedures can be found, if not in the protocol                                                                     | ___ 11-13 ___     |
| 2  |                                 |     |                                                                                                                                                                                                                                                                                                                                       |                   |
| 3  |                                 |     |                                                                                                                                                                                                                                                                                                                                       |                   |
| 4  |                                 |     |                                                                                                                                                                                                                                                                                                                                       |                   |
| 5  | Statistical methods             | 20a | Statistical methods for analysing primary and secondary outcomes. Reference to where other details of the statistical analysis plan can be found, if not in the protocol                                                                                                                                                              | ___ 11-13 ___     |
| 6  |                                 |     |                                                                                                                                                                                                                                                                                                                                       |                   |
| 7  |                                 |     |                                                                                                                                                                                                                                                                                                                                       |                   |
| 8  |                                 | 20b | Methods for any additional analyses (eg, subgroup and adjusted analyses)                                                                                                                                                                                                                                                              | ___ NA ___        |
| 9  |                                 |     |                                                                                                                                                                                                                                                                                                                                       |                   |
| 10 |                                 | 20c | Definition of analysis population relating to protocol non-adherence (eg, as randomised analysis), and any statistical methods to handle missing data (eg, multiple imputation)                                                                                                                                                       | ___ NA ___        |
| 11 |                                 |     |                                                                                                                                                                                                                                                                                                                                       |                   |
| 12 |                                 |     |                                                                                                                                                                                                                                                                                                                                       |                   |
| 13 |                                 |     |                                                                                                                                                                                                                                                                                                                                       |                   |
| 14 | <b>Methods: Monitoring</b>      |     |                                                                                                                                                                                                                                                                                                                                       |                   |
| 15 |                                 |     |                                                                                                                                                                                                                                                                                                                                       |                   |
| 16 | Data monitoring                 | 21a | Composition of data monitoring committee (DMC); summary of its role and reporting structure; statement of whether it is independent from the sponsor and competing interests; and reference to where further details about its charter can be found, if not in the protocol. Alternatively, an explanation of why a DMC is not needed | ___ 12, 13 ___    |
| 17 |                                 |     |                                                                                                                                                                                                                                                                                                                                       |                   |
| 18 |                                 |     |                                                                                                                                                                                                                                                                                                                                       |                   |
| 19 |                                 |     |                                                                                                                                                                                                                                                                                                                                       |                   |
| 20 |                                 |     |                                                                                                                                                                                                                                                                                                                                       |                   |
| 21 |                                 |     |                                                                                                                                                                                                                                                                                                                                       |                   |
| 22 |                                 | 21b | Description of any interim analyses and stopping guidelines, including who will have access to these interim results and make the final decision to terminate the trial                                                                                                                                                               | ___ 12 ___        |
| 23 |                                 |     |                                                                                                                                                                                                                                                                                                                                       |                   |
| 24 |                                 |     |                                                                                                                                                                                                                                                                                                                                       |                   |
| 25 | Harms                           | 22  | Plans for collecting, assessing, reporting, and managing solicited and spontaneously reported adverse events and other unintended effects of trial interventions or trial conduct                                                                                                                                                     | ___ NA ___        |
| 26 |                                 |     |                                                                                                                                                                                                                                                                                                                                       |                   |
| 27 |                                 |     |                                                                                                                                                                                                                                                                                                                                       |                   |
| 28 | Auditing                        | 23  | Frequency and procedures for auditing trial conduct, if any, and whether the process will be independent from investigators and the sponsor                                                                                                                                                                                           | ___ NA ___        |
| 29 |                                 |     |                                                                                                                                                                                                                                                                                                                                       |                   |
| 30 |                                 |     |                                                                                                                                                                                                                                                                                                                                       |                   |
| 31 |                                 |     |                                                                                                                                                                                                                                                                                                                                       |                   |
| 32 | <b>Ethics and dissemination</b> |     |                                                                                                                                                                                                                                                                                                                                       |                   |
| 33 |                                 |     |                                                                                                                                                                                                                                                                                                                                       |                   |
| 34 | Research ethics approval        | 24  | Plans for seeking research ethics committee/institutional review board (REC/IRB) approval                                                                                                                                                                                                                                             | ___ 3, 10, 16 ___ |
| 35 |                                 |     |                                                                                                                                                                                                                                                                                                                                       |                   |
| 36 |                                 |     |                                                                                                                                                                                                                                                                                                                                       |                   |
| 37 | Protocol amendments             | 25  | Plans for communicating important protocol modifications (eg, changes to eligibility criteria, outcomes, analyses) to relevant parties (eg, investigators, REC/IRBs, trial participants, trial registries, journals, regulators)                                                                                                      | ___ NA ___        |
| 38 |                                 |     |                                                                                                                                                                                                                                                                                                                                       |                   |
| 39 |                                 |     |                                                                                                                                                                                                                                                                                                                                       |                   |
| 40 |                                 |     |                                                                                                                                                                                                                                                                                                                                       |                   |
| 41 |                                 |     |                                                                                                                                                                                                                                                                                                                                       |                   |
| 42 |                                 |     |                                                                                                                                                                                                                                                                                                                                       |                   |
| 43 |                                 |     |                                                                                                                                                                                                                                                                                                                                       |                   |
| 44 |                                 |     |                                                                                                                                                                                                                                                                                                                                       |                   |
| 45 |                                 |     |                                                                                                                                                                                                                                                                                                                                       |                   |
| 46 |                                 |     |                                                                                                                                                                                                                                                                                                                                       |                   |

|    |                               |     |                                                                                                                                                                                                                                                                                     |                          |
|----|-------------------------------|-----|-------------------------------------------------------------------------------------------------------------------------------------------------------------------------------------------------------------------------------------------------------------------------------------|--------------------------|
| 1  | Consent or assent             | 26a | Who will obtain informed consent or assent from potential trial participants or authorised surrogates, and how (see Item 32)                                                                                                                                                        | ___ NA ___               |
| 2  |                               |     |                                                                                                                                                                                                                                                                                     |                          |
| 3  |                               |     |                                                                                                                                                                                                                                                                                     |                          |
| 4  |                               | 26b | Additional consent provisions for collection and use of participant data and biological specimens in ancillary studies, if applicable                                                                                                                                               | ___ NA ___               |
| 5  |                               |     |                                                                                                                                                                                                                                                                                     |                          |
| 6  |                               |     |                                                                                                                                                                                                                                                                                     |                          |
| 7  | Confidentiality               | 27  | How personal information about potential and enrolled participants will be collected, shared, and maintained in order to protect confidentiality before, during, and after the trial                                                                                                | ___ 11-13 ___            |
| 8  |                               |     |                                                                                                                                                                                                                                                                                     |                          |
| 9  |                               |     |                                                                                                                                                                                                                                                                                     |                          |
| 10 | Declaration of interests      | 28  | Financial and other competing interests for principal investigators for the overall trial and each study site                                                                                                                                                                       | ___ 16 ___               |
| 11 |                               |     |                                                                                                                                                                                                                                                                                     |                          |
| 12 |                               |     |                                                                                                                                                                                                                                                                                     |                          |
| 13 | Access to data                | 29  | Statement of who will have access to the final trial dataset, and disclosure of contractual agreements that limit such access for investigators                                                                                                                                     | ___ 13 ___               |
| 14 |                               |     |                                                                                                                                                                                                                                                                                     |                          |
| 15 |                               |     |                                                                                                                                                                                                                                                                                     |                          |
| 16 | Ancillary and post-trial care | 30  | Provisions, if any, for ancillary and post-trial care, and for compensation to those who suffer harm from trial participation                                                                                                                                                       | ___ NA ___               |
| 17 |                               |     |                                                                                                                                                                                                                                                                                     |                          |
| 18 |                               |     |                                                                                                                                                                                                                                                                                     |                          |
| 19 |                               |     |                                                                                                                                                                                                                                                                                     |                          |
| 20 | Dissemination policy          | 31a | Plans for investigators and sponsor to communicate trial results to participants, healthcare professionals, the public, and other relevant groups (eg, via publication, reporting in results databases, or other data sharing arrangements), including any publication restrictions | ___ 3, 14 ___            |
| 21 |                               |     |                                                                                                                                                                                                                                                                                     |                          |
| 22 |                               |     |                                                                                                                                                                                                                                                                                     |                          |
| 23 |                               |     |                                                                                                                                                                                                                                                                                     |                          |
| 24 |                               | 31b | Authorship eligibility guidelines and any intended use of professional writers                                                                                                                                                                                                      | ___ NA ___               |
| 25 |                               |     |                                                                                                                                                                                                                                                                                     |                          |
| 26 |                               | 31c | Plans, if any, for granting public access to the full protocol, participant-level dataset, and statistical code                                                                                                                                                                     | ___ NA ___               |
| 27 |                               |     |                                                                                                                                                                                                                                                                                     |                          |
| 28 |                               |     |                                                                                                                                                                                                                                                                                     |                          |
| 29 | <b>Appendices</b>             |     |                                                                                                                                                                                                                                                                                     |                          |
| 30 |                               |     |                                                                                                                                                                                                                                                                                     |                          |
| 31 | Informed consent materials    | 32  | Model consent form and other related documentation given to participants and authorised surrogates                                                                                                                                                                                  | ___ 10, Suppl file 3 ___ |
| 32 |                               |     |                                                                                                                                                                                                                                                                                     |                          |
| 33 |                               |     |                                                                                                                                                                                                                                                                                     |                          |
| 34 | Biological specimens          | 33  | Plans for collection, laboratory evaluation, and storage of biological specimens for genetic or molecular analysis in the current trial and for future use in ancillary studies, if applicable                                                                                      | ___ NA ___               |
| 35 |                               |     |                                                                                                                                                                                                                                                                                     |                          |
| 36 |                               |     |                                                                                                                                                                                                                                                                                     |                          |

\*It is strongly recommended that this checklist be read in conjunction with the SPIRIT 2013 Explanation & Elaboration for important clarification on the items. Amendments to the protocol should be tracked and dated. The SPIRIT checklist is copyrighted by the SPIRIT Group under the Creative Commons "[Attribution-NonCommercial-NoDerivs 3.0 Unported](https://creativecommons.org/licenses/by-nc-nd/3.0/)" license.

## HSCP team intervention in the ED

**Supplementary File 2 – Adaptation evaluation form**

Evaluation form for trial adaptations (based on Stirman et al., 2013)

| Dimension                                                         | Description |
|-------------------------------------------------------------------|-------------|
| WHAT was modified?                                                |             |
| - Content                                                         |             |
| - Context                                                         |             |
| If content modification, what was the nature of the modification? |             |
| - Tailoring/tweaking/refining                                     |             |
| - Adding elements                                                 |             |
| - Removing/skipping elements                                      |             |
| - Shortening                                                      |             |
| - Lengthening                                                     |             |
| - Substituting                                                    |             |
| - Reordering of segments                                          |             |
| - Integrating intervention into different framework               |             |
| - Integrating another treatment                                   |             |
| - Repeating elements                                              |             |
| - Loosening structure                                             |             |
| - Departing from intervention                                     |             |
| If context modification, which of the following apply?            |             |
| - Format                                                          |             |
| - Setting                                                         |             |
| - Personnel                                                       |             |
| - Population                                                      |             |
| By WHOM were modifications made?                                  |             |
| - Individual practitioner/facilitator                             |             |
| - Team                                                            |             |
| - Non-program staff                                               |             |
| - Administration                                                  |             |
| - Program developer                                               |             |
| - Researcher                                                      |             |
| - Coalition of stakeholders                                       |             |
| - Unknown/unspecified                                             |             |
| At what LEVEL OF DELIVERY?                                        |             |
| - Individual patient level                                        |             |
| - Group level                                                     |             |
| - Individual practitioner level                                   |             |
| - Clinic/unit level                                               |             |
| - Hospital level                                                  |             |
| - Network level                                                   |             |
| - System level                                                    |             |

1  
2  
3 HSCP team ED intervention – Process evaluation protocol  
4  
5

6 **Supplementary File 3 – Interview schedule**  
7  
8  
9

10  
11 Trial clinical team (40-60 minutes focus group)  
12  
13

14 **Implementation**  
15

- 16  
17  
18 1. Tell me about the preparation phase prior to implementation of the trial: What  
19 types of activities were carried to prepare for the trial?  
20  
21  
22 2. Could you describe a typical day of the intervention?  
23  
24  
25 3. Do you think that the implementation was carried as planned or were there  
26 adaptations made? If so, which?  
27  
28  
29 4. How did you feel about the recruitment part of the trial?  
30  
31

32 **Mechanisms**  
33

- 34  
35 5. How do you think the patients felt about being involved in the intervention?  
36  
37 6. How do you think other staff members felt about the intervention?  
38  
39  
40 7. What, in your opinion, worked well in the intervention and what might have  
41 worked better?  
42  
43  
44 8. Do you recall anything unexpected occurring during the intervention that might  
45 have influenced its implementation?  
46  
47  
48

49 **Context**  
50

- 51  
52 9. What factors external to the intervention do you think have influenced its  
53 implementation?  
54  
55  
56

57 **Recommendations for future practice**  
58  
59  
60

- 1  
2  
3 10. What recommendations would you make should the intervention be considered for  
4  
5 other emergency departments in the future?  
6  
7  
8  
9

11 Other staff members (focus group or 1:1 interview)  
12  
13

14 Implementation  
15

- 16  
17 1. How were you informed or came to know about the OPTIMEND intervention?  
18  
19 2. If you were working in the ED during the intervention, how would you describe  
20 your interaction with the OPTIMEND team?  
21  
22  
23  
24

25 Mechanisms  
26

- 27  
28 3. How do you think the patients felt about being involved in the intervention?  
29  
30 4. How do you think other staff members felt about the intervention?  
31  
32 5. What, in your opinion, worked well in the intervention and what might have  
33 worked better?  
34  
35 6. Do you recall anything unexpected occurring during the intervention that might  
36 have influenced its implementation?  
37  
38  
39  
40  
41

42 Context  
43

- 44  
45 7. What factors external to the intervention do you think have influenced its  
46 implementation?  
47  
48  
49

50 Recommendations for future practice  
51

- 52  
53 8. What recommendations would you make should the intervention be considered for  
54 other emergency departments in the future?  
55  
56  
57  
58  
59  
60



# BMJ Open

## Implementing an Allied Health Team Intervention to Improve the Care of Older Adults in the Emergency Department: Protocol for a Process Evaluation

|                                 |                                                                                                                                                                                                                                                                                                                                                                                                                                                                                                                                                                                                                                                                                                                                                                                                                                                                                                                                                                                                                                                                                   |
|---------------------------------|-----------------------------------------------------------------------------------------------------------------------------------------------------------------------------------------------------------------------------------------------------------------------------------------------------------------------------------------------------------------------------------------------------------------------------------------------------------------------------------------------------------------------------------------------------------------------------------------------------------------------------------------------------------------------------------------------------------------------------------------------------------------------------------------------------------------------------------------------------------------------------------------------------------------------------------------------------------------------------------------------------------------------------------------------------------------------------------|
| Journal:                        | <i>BMJ Open</i>                                                                                                                                                                                                                                                                                                                                                                                                                                                                                                                                                                                                                                                                                                                                                                                                                                                                                                                                                                                                                                                                   |
| Manuscript ID                   | bmjopen-2019-032645.R1                                                                                                                                                                                                                                                                                                                                                                                                                                                                                                                                                                                                                                                                                                                                                                                                                                                                                                                                                                                                                                                            |
| Article Type:                   | Protocol                                                                                                                                                                                                                                                                                                                                                                                                                                                                                                                                                                                                                                                                                                                                                                                                                                                                                                                                                                                                                                                                          |
| Date Submitted by the Author:   | 28-Jun-2019                                                                                                                                                                                                                                                                                                                                                                                                                                                                                                                                                                                                                                                                                                                                                                                                                                                                                                                                                                                                                                                                       |
| Complete List of Authors:       | Cassarino, Marica; University of Limerick Faculty of Education and Health Sciences, School of Allied Health<br>Cronin, Una; University Hospital Limerick, Retrieval, Emergency and Disaster Medicine Research and Development Unit (REDSPoT)<br>Robinson, Katie; University of Limerick Faculty of Education and Health Sciences, School of Allied Health<br>Quinn, Rosie; Our Lady of Lourdes Hospital, Emergency Department<br>Boland, Fiona; Royal College of Surgeons Ireland, 123 St Stephens Green, HRB Centre For Primary Care Research, Division of Population Health Sciences (PHS)<br>Ward, Marie; Trinity College Dublin, School of Psychology<br>MacNamara, Rosa; St. Vincent's University Hospital, Emergency Department<br>O'Connor, Margaret; UHL,<br>McCarthy, Gerard; Cork University Hospital, Emergency Department<br>Ryan, Damien; University Hospital Limerick, Retrieval, Emergency and Disaster Medicine Research and Development Unit (REDSPoT)<br>Galvin, Rose; University of Limerick Faculty of Education and Health Sciences, School of Allied Health |
| <b>Primary Subject Heading</b>: | Health services research                                                                                                                                                                                                                                                                                                                                                                                                                                                                                                                                                                                                                                                                                                                                                                                                                                                                                                                                                                                                                                                          |
| Secondary Subject Heading:      | Emergency medicine                                                                                                                                                                                                                                                                                                                                                                                                                                                                                                                                                                                                                                                                                                                                                                                                                                                                                                                                                                                                                                                                |
| Keywords:                       | Allied health, Emergency department, Process evaluation, Implementation, Interdisciplinary care, Health service delivery                                                                                                                                                                                                                                                                                                                                                                                                                                                                                                                                                                                                                                                                                                                                                                                                                                                                                                                                                          |
|                                 |                                                                                                                                                                                                                                                                                                                                                                                                                                                                                                                                                                                                                                                                                                                                                                                                                                                                                                                                                                                                                                                                                   |

SCHOLARONE™  
Manuscripts

1  
2  
3           **Title:** Implementing an Allied Health Team Intervention to Improve the Care of Older  
4  
5           2 Adults in the Emergency Department: Protocol for a Process Evaluation  
6  
7  
8  
9           3

10  
11           4           **Authors:** Marica Cassarino<sup>1</sup>, Úna Cronin<sup>2</sup>, Katie Robinson<sup>1</sup>, Rosie Quinn<sup>3</sup>, Fiona  
12  
13           5 Boland<sup>4</sup>, Marie E. Ward<sup>5</sup>, Rosa McNamara<sup>6</sup>, Margaret O'Connor<sup>7,8</sup>, Gerard McCarthy<sup>9</sup>,  
14  
15           6 Damien Ryan<sup>2,7</sup>, Rose Galvin<sup>1</sup>  
16  
17  
18  
19           7

20  
21  
22           8           **Correspondence:** Dr Marica Cassarino, marica.cassarino@ul.ie, School of Allied  
23  
24           9 Health, Faculty of Education and Health Sciences, University of Limerick, Ireland.  
25  
26  
27  
28           10

29  
30           11           **Authors' information:**

31  
32           12           <sup>1</sup> School of Allied Health, Faculty of Education and Health Sciences, Health Research  
33  
34           13 Institute, University of Limerick, Ireland. Rose Galvin: [rose.galvin@ul.ie](mailto:rose.galvin@ul.ie); Katie Robinson:  
35  
36           14 [katie.robinson@ul.ie](mailto:katie.robinson@ul.ie)

37  
38           15           <sup>2</sup> Retrieval, Emergency and Disaster Medicine Research and Development Unit  
39  
40           16 (REDSPoT), Emergency Department, University Hospital Limerick, Dooradoyle, Limerick,  
41  
42           17 Ireland; [unaAB.cronin@hse.ie](mailto:unaAB.cronin@hse.ie); [damien.ryan@hse.ie](mailto:damien.ryan@hse.ie)

43  
44           18           <sup>3</sup>Emergency Department, Our Lady of Lourdes Hospital Drogheda, Ireland;  
45  
46           19 [rosie.quinn@hse.ie](mailto:rosie.quinn@hse.ie)

47  
48           20           <sup>4</sup> HRB Centre for Primary Care Research, Royal College of Surgeons in Ireland,  
49  
50           21 Dublin, Ireland; [fionaboland@rcsi.ie](mailto:fionaboland@rcsi.ie)

51  
52           22           <sup>5</sup> School of Psychology, Trinity College, the University of Dublin, Dublin 2, Ireland;  
53  
54           23 [marie.ward@tcd.ie](mailto:marie.ward@tcd.ie)

1  
2  
3 24           <sup>6</sup> Emergency Department, St. Vincent University Hospital, Dublin, Ireland;  
4

5 25   [rosamcnamara@svhg.ie](mailto:rosamcnamara@svhg.ie)  
6

7  
8 26           <sup>7</sup> Graduate Entry Medical School, Faculty of Education and Health Sciences,  
9

10 27   University of Limerick, Ireland  
11

12 28           <sup>8</sup> Department of Ageing and Therapeutics, University Hospital Limerick, Dooradoyle,  
13

14 29   Limerick, Ireland; [oconmargaret@gmail.com](mailto:oconmargaret@gmail.com)  
15

16  
17 30           <sup>9</sup> Emergency Department, Cork University Hospital, Cork, Ireland;  
18

19 31   [gerard.mccarthy@hse.ie](mailto:gerard.mccarthy@hse.ie)  
20

21 32  
22

23  
24 33  
25

26  
27 34           **Word count** (excluding title page, abstract, references, figures and tables): 2,689  
28  
29  
30  
31  
32  
33  
34  
35  
36  
37  
38  
39  
40  
41  
42  
43  
44  
45  
46  
47  
48  
49  
50  
51  
52  
53  
54  
55  
56  
57  
58  
59  
60

1  
2  
3  
4 35           **ABSTRACT**

5  
6 36           **Introduction:** Health and Social Care Professionals (HSCPs) have increasingly  
7  
8 37           contributed to enhance the care of patients in Emergency Departments (EDs), particularly for  
9  
10 38           older adults who are frequent ED attendees with significant adverse outcomes. For the first  
11  
12 39           time, the effectiveness of a HSCP team intervention for older adults in the ED has been tested  
13  
14 40           in a large randomised controlled trial, providing an opportunity to explore the implementation  
15  
16 41           process for this type of intervention. This protocol describes a process evaluation that will to  
17  
18 42           investigate the implementation, delivery and impact of an HSCP team intervention in the ED.  
19  
20  
21

22  
23 43           **Methods and analysis:** Using the Medical Research Council (MRC) Framework for  
24  
25 44           process evaluations, we will employ a mixed-methods approach to provide a description of  
26  
27 45           the process of implementation and delivery of the HSCP intervention in the ED, evaluate its  
28  
29 46           fidelity, dose and reach, and explore the perceptions of key staff members in relations to the  
30  
31 47           mechanisms and contexts of impact at the levels of individuals, physical environment,  
32  
33 48           operations, communication and the broader hospital and healthcare system.  
34  
35  
36

37 49           **Ethics and dissemination:** Ethical approval for this study was received from the HSE  
38  
39 50           Mid-Western Regional Hospital Research Ethics Committee (Ref: 103/18). All participants  
40  
41 51           will be invited to read and sign a written consent form prior to participation. The results of  
42  
43 52           this review will be disseminated through publication in a peer-review journal and presented at  
44  
45 53           relevant conferences.  
46  
47  
48

49 54

50  
51  
52 55           **ARTICLE SUMMARY**

53  
54  
55 56           **Strengths and limitations of this study:**  
56  
57  
58  
59  
60

- 1  
2  
3 57 - This is the first formal process evaluation of the implementation of a Health  
4  
5 58 and Social Care Professional team caring for older patients in the emergency  
6  
7 department.  
8 59  
9  
10 60 - The study will employ the Medical Research Council framework for process  
11  
12 61 evaluations.  
13  
14 62 - This study will adopt a mixed-methods approach and involve different  
15  
16 stakeholders to investigate the implementation, delivery and impact of the  
17 63 allied health intervention.  
18  
19 64  
20  
21 65 - Group interviews may introduce biases related to group dynamics and social  
22  
23 desirability that we will attempt to overcome using also individual interviews  
24 66 and quantitative data.  
25  
26 67  
27  
28 68 - Findings will provide key information for future implementations of allied  
29  
30 health teams in emergency care settings.  
31 69  
32  
33 70

34  
35  
36 71 **Keywords:** Allied health; emergency department; process evaluation;  
37  
38 72 implementation; interdisciplinary care; health service delivery.  
39  
40

41 73  
42  
43  
44  
45  
46  
47  
48  
49  
50  
51  
52  
53  
54  
55  
56  
57  
58  
59  
60

## 74 INTRODUCTION

### 75 Background

76 Complex interventions have been increasingly employed in an attempt to enhance  
77 health service delivery as well as other societal issues [1]. Randomised controlled trials  
78 (RCTs) are traditionally considered as the reference standard for establishing the  
79 effectiveness of interventions [1,2]. Recent efforts have been made to include process  
80 evaluations as a core component of investigations of effectiveness, as stated in a recent  
81 Medical Research Council (MRC) guidance document [1]. Conducting a process evaluation  
82 of an intervention, particularly in the case of complex quality improvement interventions, is  
83 important to gain a deeper understanding of the mechanisms influencing effectiveness (or  
84 lack of it), to explain discrepancies between expected and observed outcomes, to highlight  
85 the complexities of an intervention and the impact of contextual factors on outcomes, and  
86 thus to better inform implementation [2–4].

87 The MRC framework highlights three key functions of process evaluations: 1)  
88 examining the implementation process and its content (fidelity-adaptation, dose and reach);  
89 2) understanding the mechanisms of impact (participants' response to the intervention;  
90 mediators; unexpected pathways and consequences); 3) investigating the influence of the  
91 context of the intervention. Such a framework enables to capture the complexities of  
92 developing and implementing a health service intervention, so to offer useful insights for  
93 future quality improvement. In this process evaluation, we aim to use the MRC framework to  
94 evaluate the process, delivery and impact of the implementation of an allied health team-  
95 based intervention within an emergency setting.

## 96 **Intervention characteristics**

97 The present process evaluation will explore the process of implementation of the  
98 OPTIMEND intervention (i.e., “Optimising early assessment and intervention by Health and  
99 Social Care Professionals in the Emergency Department”). OPTIMEND is the first  
100 randomised controlled trial aimed to measure the impact of early assessment and intervention  
101 by a team of Health and Social Care Professionals (HSCPs) working in the Emergency  
102 Department (ED) on the quality, safety and cost-effectiveness of care for older adults, as  
103 compared to usual ED care. The HSCP team comprises of a senior physiotherapist, a senior  
104 occupational therapist, and a senior medical social worker providing functional assessment,  
105 early interventions and discharge plans to adults aged  $\geq 65$  years. A total of 354 participants  
106 were recruited in the study from December 2018 until May 2019 and randomly allocated to  
107 the HSCP intervention or ED usual care (i.e., medical team). Participants in both intervention  
108 and control groups are followed-up through telephone assessment at 30 days, four and six  
109 months after the ED index visit (ongoing until November 2019). Primary outcomes of the  
110 trial include ED length of stay and rates of hospital admissions. Secondary outcomes include  
111 function and quality of life (baseline and follow-up), satisfaction with care, ED re-visits and  
112 healthcare utilisation (follow-up), and cost-effectiveness.

113 Following the MRC framework for complex interventions [1], the design of the trial  
114 was informed by a systematic review of the existing international literature regarding the  
115 effectiveness of HSCP interventions in the ED [5]. A qualitative study was also conducted  
116 with a range of stakeholders including ED patients and their families, ED staff, HSCPs and  
117 pre-hospital staff to explore their views on the role and impact of HSCPs working in teams in  
118 the ED. A paper reporting the findings of this phase is currently in submission. We also  
119 carried out an analysis of routine observational data to describe the flow of patients who  
120 attend a large Irish ED without a dedicated HSCP team in the ED. Allied health team services

1  
2  
3 121 in the ED are routine practice in certain areas, such as in Australia [6]; however, the evidence  
4  
5 122 on the impact HSCP teams on the quality, safety and cost-effectiveness of care is limited and  
6  
7 123 heterogeneous. For this reason, there is a dearth of evaluations available on the  
8  
9  
10 124 implementation, delivery and impact of this model of care, often limited to investigations of  
11  
12 125 acceptability or patient/staff satisfaction [7–9]. The OPTIMEND is the first study  
13  
14 126 internationally to test the effectiveness an ED-based HSCP team intervention by adopting a  
15  
16  
17 127 robust methodology, thus offering the opportunity to evaluate its implementation.  
18  
19

### 20 128 **Theoretical framework**

21  
22 129 The causal assumptions of the intervention and theoretical framework guiding this  
23  
24 130 evaluation are outlined in the logic model presented in Figure 1, based on logic models  
25  
26 131 recommended elsewhere [2,10]. A key input for the intervention came from the emergency  
27  
28 132 care national priorities set by the ED taskforce within the Health Service Executive (HSE) in  
29  
30 133 Ireland, which included improving workforce and interdisciplinary care in emergency  
31  
32 134 settings in order to enhance patient and process outcomes [11]; following this, funding was  
33  
34 135 secured for the design and implementation of an HSCP team intervention in the ED of a  
35  
36  
37 136 regional hospital in Ireland with a large catchment area, using the MRC framework for  
38  
39  
40 137 complex interventions. A synthesis of the evidence on this model of care and consultations  
41  
42 138 with relevant stakeholders, as described in the previous section, informed the development of  
43  
44 139 the intervention. Key assumptions of this HSCP intervention were that having a  
45  
46 140 multidisciplinary team of professionals with specialised skills in the care of the older person  
47  
48 141 would enhance the quality and timeliness of decision-making (ED processes), and that this  
49  
50 142 would result in shorter stay for older adults as well as reduced rates of unnecessary hospital  
51  
52 143 admissions (ED performance). Ultimately, it is expected that the intervention will benefit  
53  
54 144 patient's health outcomes by promoting better functioning and quality of life than usual ED  
55  
56  
57  
58  
59  
60



1  
2  
3 145 care, higher satisfaction with the care received, and a better use of primary and community  
4  
5 146 care.  
6  
7

8 147 [FIGURE 1 HERE]  
9

10  
11 148 Figure legend: Fig. 1. HSCP intervention logic model  
12  
13

14 149  
15

### 17 150 **Objectives**

18  
19 151 Based on the characteristics and assumptions of the OPTIMEND trial, the aim of this  
20  
21  
22 152 process evaluation is to understand the functioning and effects of the OPTIMEND  
23  
24 153 intervention by examining how the intervention was delivered and received in practice. In  
25  
26 154 line with the MRC guidelines for process evaluations of complex interventions [2], the study  
27  
28  
29 155 has the following objectives to achieve this aim:

- 30  
31  
32 156 1. To describe and analyse the implementation of the OPTIMEND trial (what was  
33  
34 157 delivered and how), including an exploration of the intervention fidelity, dose and  
35  
36 158 reach;  
37  
38  
39 159 2. To explore the mechanisms of impact within the intervention (i.e., barriers and  
40  
41 160 facilitators of implementation in relation to participants' responses, potential  
42  
43 161 mediators and unexpected pathways);  
44  
45 162 3. To highlight contextual influences on impact, delivery and acceptability (i.e.,  
46  
47  
48 163 individuals, physical environment, ED processes and relations, hospital and  
49  
50 164 healthcare system).  
51

52  
53 165  
54  
55  
56  
57  
58  
59  
60

## 166 **METHODS AND ANALYSIS**

### 167 **Design**

168 The process evaluation will employ a mixed-methods approach to address the above  
169 objectives in relation to a HSCP intervention in the ED tested within a randomised controlled  
170 trial; the trial for which this process evaluation will be conducted is registered on  
171 ClinicalTrials.gov, NCT03739515; registered on 12<sup>th</sup> November 2018.

172 The reporting of this protocol aligns with the Standard Protocol Items for Clinical  
173 Trials (SPIRIT) guidelines [12], and a full reporting SPIRIT checklist is presented in  
174 Supplementary File 1. However, given the nature of the study (i.e., not a trial but a process  
175 evaluation), the protocol has been written by incorporating appropriate elements of the  
176 Criteria for Reporting the Development and Evaluation of Complex Interventions in  
177 Healthcare (revised guideline CReDECI 2) [13], particularly in relation to reporting the  
178 development and evaluation of the intervention. Key considerations suggested by the MRC  
179 [2] will be made in relation to the relations between the quantitative and qualitative  
180 components of the evaluation, and the relation of the process evaluation to other evaluation  
181 components (trial outcomes on clinical and cost effectiveness).

### 183 **Participants**

184 The evaluation will involve key staff members working in the hospital where the  
185 OPTIMEND intervention was carried out (University Hospital Limerick, Ireland), including  
186 the HSCPs who implemented the intervention and other staff members who worked in the ED  
187 during the OPTIMEND trial and/or contributed to the development and implementation of  
188 the intervention. Given the characteristics of the setting and the fact that the intervention was

1  
2  
3 189 conducted at one site only, it is anticipated that around 20-25 participants will complete the  
4  
5 190 study. Specifically, the following participant categories will be included in the study:

- 6  
7  
8 191 - the clinical team involved in the intervention (senior physiotherapist, senior  
9  
10 192 occupational therapist, senior medical social worker, research nurse);  
11  
12  
13 193 - ED doctors (4-5 participants),  
14  
15 194 - ED nurses (4-5 participants);  
16  
17  
18 195 - Other hospital staff members who contributed to the development and  
19  
20 196 implementation of the intervention (e.g., Informatics, Planning and Performance  
21  
22 197 Department; Departments managers; other HSCPs).

23  
24  
25 198 Participant recruitment will be conducted through convenience and snowball  
26  
27 199 sampling, with prospective participants being identified by the research team and the clinical  
28  
29 200 team involved in the intervention. The clinical team will also act as gatekeepers linking  
30  
31 201 potential participants with the researcher managing enrolment (MC); furthermore, study  
32  
33 202 leaflets will be distributed at UHL. Prospective participants will be provided with an  
34  
35 203 information sheet outlining the evaluation aim and procedure; written informed consent will  
36  
37 204 be sought prior to participation. Ethical approval for the study was received from the HSE  
38  
39 205 Mid-Western Regional Hospital Research Ethics Committee (REC 103/18) in September  
40  
41 206 2018. At the time of submission of this protocol, participants recruitment is ongoing and  
42  
43 207 expected to be completed by the end of July 2019.  
44  
45  
46  
47  
48

### 49 208 **Outcomes and Measures**

50  
51 209 Using the MRC process evaluation framework, the study will focus on the measures  
52  
53 210 and research questions outlined in Table 1. The process of implementation will be described  
54  
55 211 in terms of activities and processes put in place for the development and delivery of the  
56  
57 212 implementation, the fidelity of the intervention (adherence to protocol and evidence as well  
58  
59  
60

1  
2  
3 213 as adaptations), its dose and reach. Mechanisms internal to the intervention will be  
4  
5 214 investigated in relation to the participants' interaction with the intervention, potential  
6  
7 215 mediators and unexpected pathways. Lastly, using a system approach, potential facilitators  
8  
9 216 and barriers to implementation outside of the intervention will be explored at the level of  
10  
11 217 individuals, the ED physical environment, procedures, communication and the broader  
12  
13 218 healthcare system.  
14  
15  
16  
17  
18  
19

20  
21 220 [TABLE 1 HERE. See end of manuscript]  
22  
23  
24  
25

26 221

## 27 222 **Data collection and analysis**

28  
29 223 As described in Table 1, a mix of quantitative and qualitative methods will be used to  
30  
31 224 address the objectives of this process evaluation.  
32  
33

34 225 The content and process of delivery will be evaluated quantitatively through the  
35  
36 226 intervention activity logs. The implementation will also be investigated in terms of fidelity,  
37  
38 227 dose and reach. Fidelity is a central measure in process evaluations [4] which provides  
39  
40 228 information on the extent to which the intervention was delivered as planned or adapted to a  
41  
42 229 specific context. Although maintaining appropriate levels of fidelity has been suggested to  
43  
44 230 enhance the impact of intervention [14], debates on the tension between intervention fidelity  
45  
46 231 and adaption are ongoing, translating into a variety of frameworks attempting to  
47  
48 232 conceptualise fidelity [2]. For the purpose of this process evaluation, we will use the  
49  
50 233 framework proposed by Carroll and colleagues [4] in relation to implementation fidelity for  
51  
52 234 health services interventions and the MRC guidelines [2] to integrate a quantification of  
53  
54 235 adherence, dose and reach with a qualitative exploration of mechanisms of impact within and  
55  
56 236 beyond the intervention. The trial activity logs and recruitment logs will be analysed to  
57  
58  
59  
60

1  
2  
3 237 quantify and describe the intervention delivery, comparisons will be made with the trial  
4  
5 238 protocol and evidence base (i.e., systematic review) to evaluate adherence and dose;  
6  
7  
8 239 descriptive quantitative analyses of participants lost at follow-up will be carried to quantify  
9  
10 240 attrition. Potential modifications will be quantified and described with the help of the clinical  
11  
12 241 team using Stirman's framework for interventions adaptations [15]; a detailed evaluation  
13  
14 242 form is included in Supplementary File 2, which focuses on what was modified and at what  
15  
16  
17 243 level of delivery, the nature of the modification, and the agents of the modification.

18  
19  
20 244 The qualitative elements of the implementation will be explored via semi-structured  
21  
22 245 interviews and focus groups. An interview schedule is presented in Supplementary File 3,  
23  
24 246 with questions tailored to the trial clinical team and to other staff members. The members of  
25  
26  
27 247 the trial clinical team will be interviewed as a group to describe the process of  
28  
29 248 implementation and delivery, as well as discuss its acceptability and impact; group interviews  
30  
31 249 will also be organised with other members of staff, paying attention to capture the different  
32  
33  
34 250 perspectives of multiple professionals. In addition, prospective participants who do not wish  
35  
36 251 or are not able to take part in the focus groups will be invited to participate in 1:1 semi-  
37  
38 252 structured interviews. Group and individual interviews have a number of strengths and  
39  
40  
41 253 weakness which make it preferable to adopt a flexible approach [16]: On one hand, working  
42  
43 254 with a group facilitates participants who might have time restrictions or feel at ease  
44  
45 255 contributing as a member of a group; on the other hand, individual interviews provide space  
46  
47 256 to individuals who may be unwilling to contribute within a group and can help to elicit more  
48  
49  
50 257 personal and truthful responses because removing potential biases related to group dynamics  
51  
52 258 and social desirability. The interviews and focus groups will be audio recorded and  
53  
54 259 transcribed. The data will be inputted in the software NVivo version 11 Plus (QSR  
55  
56  
57 260 International Pty Ltd) and analysed using the six steps of thematic analysis [17,18], with the  
58  
59 261 aim to highlight the central themes related to the research questions above. While the analysis  
60

1  
2  
3 262 will be data driven, the evaluation is informed by an existing framework, thus emerging  
4  
5 263 themes will be compared with the framework to evaluate fit.  
6  
7

8 264 By integrating the data collected quantitatively and qualitatively, our analysis will  
9  
10 265 focus on providing a description of the process of implementation as well as considerations of  
11  
12 266 the feasibility and acceptability of the intervention as perceived by key stakeholders involved.  
13  
14

15  
16 267 All electronic and hardcopy data will be stored safely by the research team and  
17  
18 268 retained in accordance to the data management policies and procedures of the University of  
19  
20 269 Limerick, Ireland. Access to the data will be limited to the research team members involved  
21  
22 270 in data analysis (MC, KR, RG).  
23  
24

25  
26 271  
27

### 28 29 272 **Patient and public involvement statement**

30  
31 273 This process evaluation will not involve patients directly, as their perceptions of the  
32  
33 274 intervention are investigated as part of the effectiveness study (currently in progress) and it  
34  
35 275 was felt that involving patients in the process evaluation as well may cause a burden without  
36  
37 276 providing novel information. The research questions of this study were informed by the need  
38  
39 277 for quality and timeliness of assessment and intervention in the ED expressed by health  
40  
41 278 service users at a Patient and Public Involvement initiative organised by the Health Service  
42  
43 279 Executive's Advocacy Unit in Ireland ([https://www.hse.ie/eng/about/who/qid/person-family-  
44  
45  
46  
47 280 engagement/listening-reports/listening-report-16.pdf](https://www.hse.ie/eng/about/who/qid/person-family-engagement/listening-reports/listening-report-16.pdf)).  
48  
49

50 281  
51  
52

### 53 282 **DISCUSSION**

54  
55 283 Process evaluations have increasingly become an important component of  
56  
57 284 investigations of the effectiveness of health service interventions [1]. Despite there are  
58  
59  
60

1  
2  
3 285 encouraging studies that support the benefits of introducing HSCPs to the ED and promoting  
4  
5 286 interdisciplinary team care, the available evidence on the effectiveness of HSCP team  
6  
7 287 interventions in the ED is limited and presents heterogenous methodologies [5]. The  
8  
9 288 completion of the first randomised controlled trial testing the impact of this model of care on  
10  
11 289 patient and process outcomes in a large ED offers the opportunity to gather information on  
12  
13 290 the process of implementation, delivery and impact, particularly in relation to its feasibility  
14  
15 291 and the facilitators and barriers influencing its development, delivery and impact. Adopting  
16  
17 292 the MRC framework for process evaluations [1] will help to ensure that key aspects of the  
18  
19 293 implementation process are explored and that the complexities of the intervention are  
20  
21 294 captured in details at multiple levels (from individuals to the healthcare system); furthermore,  
22  
23 295 involving different healthcare professionals in the evaluation will enhance the richness of  
24  
25 296 information gathered, particularly in terms of the practical elements of developing and  
26  
27 297 implementing a complex intervention in a dynamic healthcare setting. While we do not  
28  
29 298 envisage any practical and operational issues arising during the study, the evaluation will be  
30  
31 299 overseen by an interdisciplinary steering group of experts in allied health and emergency care  
32  
33 300 that will ensure the rigorous conduct of the study. The findings of this process evaluation will  
34  
35 301 be integrated with the results on the clinical and cost-effectiveness of the trial (currently in  
36  
37 302 data collection status) to provide insights on the viability of this model of care and formulate  
38  
39 303 recommendations for future implementation in other emergency care settings.  
40  
41  
42  
43  
44  
45  
46  
47  
48  
49

304

## 305 **ETHICS AND DISSEMINATION**

306 Ethical approval for this study was received from the HSE Mid-Western Regional  
307 Hospital Research Ethics Committee (Ref: 103/18). All participants will be invited to read  
308 and sign a written consent form prior to participation. The results of this review will be

1  
2  
3 309 disseminated through publication in a peer-review journal and presented at relevant  
4  
5 310 conferences.

6  
7  
8 311

9  
10  
11 312 **Study status:** At the time of submission, the status of this study is currently  
12  
13 313 “Recruiting”. Recruitment for the study commenced in June 2019 and it is anticipated to be  
14  
15 314 completed by the end of July 2019.

16  
17  
18 315

19  
20  
21  
22 316 **List of abbreviations**

23  
24 317 CReDECI 2 = Criteria for Reporting the Development and Evaluation of Complex  
25  
26 318 Interventions in Healthcare version 2

27  
28  
29 319 ED = Emergency Department

30  
31  
32 320 HSCP = Health and Social Care Professional

33  
34  
35 321 HSE = Health Service Executive

36  
37  
38 322 MRC = Medical Research Council

39  
40  
41 323 OPTIMEND = Optimising early assessment and intervention by Health and Social  
42  
43 324 Care Professionals in the Emergency Department

44  
45  
46 325 SPIRIT = Standard Protocol Items: Recommendations for Interventional Trials

47  
48  
49 326 UHL = University Hospital Limerick



1  
2  
3 327 **STATEMENTS**  
4  
5  
6  
7

8  
9 328 **Data statement:** Data sharing is not applicable to this article as no datasets were  
10  
11 329 generated or analysed for this protocol. The qualitative data collected during the study will be  
12  
13 330 stored electronically at the University of Limerick (Ireland) and be made available by the  
14  
15 331 authors on request.

16  
17  
18 332 **Acknowledgements:** Not applicable

19  
20  
21 333 **Authors' contributions:** MC and RG were major contributors in writing the protocol.  
22  
23 334 MC and RG designed the study. MC, RG, UC and KR participated in data collection and  
24  
25 335 analysis. RQ, FB, MW, RMN, MOC, GMC and DR participated in the project design and  
26  
27 336 critically appraised and edited the manuscript. RG is the guarantor of the study. All authors  
28  
29 337 read and approved the final manuscript.

30  
31  
32  
33 338 **Funding:** This research is supported by the Health Research Board of Ireland through  
34  
35 339 the Research Collaborative for Quality and Patient Safety (RCQPS 2017-2). The sponsor is  
36  
37 340 not involved in the design of the study and collection, analysis, interpretation of data, or in  
38  
39 341 writing the manuscript.

40  
41  
42  
43 342 **Competing interests:** The authors declare that they have no competing interests

44  
45  
46 343 **Participant consent:** All prospective participants for the study will be provided with  
47  
48 344 an information sheet outlining the objectives of the study and given time to ask questions. All  
49  
50 345 participants will be asked to read and sign a written consent form prior to take part.

51  
52  
53  
54 346  
55  
56  
57  
58  
59  
60

347

348 **REFERENCES**

- 349 1 Craig P, Dieppe P, Macintyre S, *et al.* Developing and evaluating complex  
350 interventions: the new Medical Research Council guidance. *BMJ* 2008;**337**:a1655.  
351 doi:10.1136/bmj.a1655
- 352 2 Moore GF, Audrey S, Barker M, *et al.* Process evaluation of complex interventions:  
353 Medical Research Council guidance. *BMJ* Published Online First: 2015.  
354 doi:10.1136/bmj.h1258
- 355 3 Hulscher MEJL, Laurant MGH, Grol RPTM. Process evaluation on quality  
356 improvement interventions. *Qual Saf Heal Care* 2003;**12**:40–6.  
357 doi:10.1136/qhc.12.1.40
- 358 4 Carroll C, Patterson M, Wood S, *et al.* A conceptual framework for implementation  
359 fidelity. *Implement Sci* 2007;**2**:40. doi:10.1186/1748-5908-2-40
- 360 5 Cassarino M, Robinson K, Quinn R, *et al.* Effectiveness of early assessment and  
361 intervention by interdisciplinary teams including health and social care professionals in  
362 the emergency department: protocol for a systematic review. *BMJ Open*  
363 2018;**8**:e023464. doi:10.1136/bmjopen-2018-023464
- 364 6 Gardner G, Gardner A, Middleton S, *et al.* Mapping workforce configuration and  
365 operational models in Australian emergency departments: a national survey. *Aust Heal*  
366 *Rev* 2018;**42**:340. doi:10.1071/AH16231
- 367 7 Holmes C, Hollebon D, Scranney A, *et al.* Embedding an allied health service in the  
368 Nelson Hospital Emergency Department: A retrospective report of a six month pilot  
369 project. *New Zeal J Physiother* 2016;**44**:17–25. doi:10.15619/NZJP/44.1.03

- 1  
2  
3 370 8 Moss JE, Flower CL, Houghton LM, *et al.* A multidisciplinary Care Coordination  
4  
5 371 Team improves emergency department discharge planning practice. *Med J ...*  
6  
7 372 2002;**177**:427–31.<http://europepmc.org/abstract/MED/12381253>  
8  
9  
10 373 9 Corbett HM, Lim WK, Davis SJ, *et al.* Care coordination in the Emergency  
11  
12 374 Department: improving outcomes for older patients. *Aust Heal Rev* 2005;**29**:43–50.  
13  
14 375 doi:10.1071/AH050043  
15  
16  
17 376 10 Hasson H. Systematic evaluation of implementation fidelity of complex interventions  
18  
19 377 in health and social care. *Implement Sci* 2010;**5**:67. doi:10.1186/1748-5908-5-67  
20  
21  
22 378 11 HSE. Emergency Department Task Force. 2015.  
23  
24  
25 379 12 Chan AW, Tetzlaff JM, Altman DG, *et al.* SPIRIT 2013 statement: Defining standard  
26  
27 380 protocol items for clinical trials. *Ann. Intern. Med.* 2013. doi:10.7326/0003-4819-158-  
28  
29 381 3-201302050-00583  
30  
31  
32 382 13 Möhler R, Köpke S, Meyer G. Criteria for Reporting the Development and Evaluation  
33  
34 383 of Complex Interventions in healthcare: Revised guideline (CReDECI 2). *Trials*  
35  
36 384 2015;**16**:204. doi:10.1186/s13063-015-0709-y  
37  
38  
39 385 14 Dusenbury L, Brannigan R, Falco M, *et al.* A review of research on fidelity of  
40  
41 386 implementation: implications for drug abuse prevention in school settings. *Health*  
42  
43 387 *Educ Res* 2003;**18**:237–56. doi:10.1093/her/18.2.237  
44  
45  
46 388 15 Stirman SW, Miller CJ, Toder K, *et al.* Development of a framework and coding  
47  
48 389 system for modifications and adaptations of evidence-based interventions. *Implement*  
49  
50 390 *Sci* 2013;**8**:65. doi:10.1186/1748-5908-8-65  
51  
52  
53 391 16 Stewart DW, Shamdasani PN. *Focus groups : theory and practice.*  
54  
55 392 <https://books.google.ie/books?hl=en&lr=&id=YU0XBAAAQBAJ&oi=fnd&pg=PP1&>  
56  
57  
58  
59  
60

1  
2  
3 393 dq=focus+groups+limitations&ots=bDrREIX3Gx&sig=VtCXWwTg1L9pJBWt-  
4  
5 394 C8o8cOJNEk&redir\_esc=y#v=onepage&q=focus groups limitations&f=false  
6  
7  
8 395 (accessed 15 May 2019).  
9

10  
11 396 17 Braun V, Clarke V, Terry G. Thematic analysis. *Qual Res Clin Heal Psychol*  
12  
13 397 2012;**24**:95–114.  
14

15  
16 398 18 Braun V, Clarke V. Using thematic analysis in psychology. *Qual Res Psychol*  
17  
18 399 2006;**3**:77–101. doi:10.1191/1478088706qp063oa  
19

20  
21 400  
22  
23  
24  
25  
26  
27  
28  
29  
30  
31  
32  
33  
34  
35  
36  
37  
38  
39  
40  
41  
42  
43  
44  
45  
46  
47  
48  
49  
50  
51  
52  
53  
54  
55  
56  
57  
58  
59  
60

Table 1 – Measures, research questions and data collection

| Dimension                            | Measure                                                                                                      | Research questions                                                                                                                                                                                            | Data source                                                        | Analysis type                |
|--------------------------------------|--------------------------------------------------------------------------------------------------------------|---------------------------------------------------------------------------------------------------------------------------------------------------------------------------------------------------------------|--------------------------------------------------------------------|------------------------------|
| Implementation                       | Process                                                                                                      | How was the intervention developed and delivered?                                                                                                                                                             | Team activity logs<br>Interviews/Focus groups                      | Quantitative descriptive     |
|                                      |                                                                                                              | What inputs, resources and structures were put into place?                                                                                                                                                    |                                                                    |                              |
|                                      | Fidelity (Adherence)                                                                                         | To which extent did the intervention align or diverge from the protocol or international practice? What types of adaptations were made to fit the specific context of care delivery?                          | Trial protocol<br>Systematic review<br>Interviews/Focus groups     | Quantitative descriptive     |
|                                      |                                                                                                              | Dose                                                                                                                                                                                                          | What was the duration, coverage and frequency of the intervention? |                              |
| Mechanisms                           | Reach                                                                                                        | What proportion of the target population (eligible patients) were enrolled in the intervention? What was the attrition rate?                                                                                  | Recruitment logs                                                   | Quantitative                 |
|                                      | Participants' responses to and interaction with intervention                                                 | How did the patients feel about being involved in the intervention?                                                                                                                                           | Interviews/Focus groups                                            | Qualitative and quantitative |
|                                      |                                                                                                              | How did other staff members feel about the intervention?                                                                                                                                                      | Data on patients' satisfaction                                     |                              |
|                                      | Mediators                                                                                                    | What aspects of the intervention influenced its implementation (people, operations, relations)?                                                                                                               | Interviews/Focus groups                                            | Qualitative                  |
| Unexpected pathways and consequences | Was there something about the intervention that was unexpected and might have influenced its implementation? | Interviews/Focus groups                                                                                                                                                                                       | Qualitative                                                        |                              |
| Context                              | Barriers and facilitators                                                                                    | What factors external to the intervention influenced its implementation and in which way? Consider multiple levels: 1) Individuals; 2) ED physical environment; 3) ED operations; 4) ED relations; 5) broader | Interviews/Focus groups                                            | Qualitative                  |

1  
2  
3  
4  
5  
6  
7  
8  
9  
10  
11  
12  
13  
14  
15  
16  
17  
18  
19  
20  
21  
22  
23  
24  
25  
26  
27  
28  
29  
30  
31  
32  
33  
34  
35  
36  
37  
38  
39  
40  
41  
42  
43  
44  
45  
46  
47  
48  
49  
50  
51  
52  
53  
54  
55  
56  
57  
58  
59  
60

hospital or healthcare  
system

---

*Notes.* Measures based on the Medical Research Council (MRC) Framework for process evaluations [1]

401

For peer review only

**OPTIMEND Logic Model**



HSCP intervention logic model



SPIRIT 2013 Checklist: Recommended items to address in a clinical trial protocol and related documents\*

| Section/item                      | Item No | Description                                                                                                                                                                                                                                                                              | Addressed on page number |
|-----------------------------------|---------|------------------------------------------------------------------------------------------------------------------------------------------------------------------------------------------------------------------------------------------------------------------------------------------|--------------------------|
| <b>Administrative information</b> |         |                                                                                                                                                                                                                                                                                          |                          |
| Title                             | 1       | Descriptive title identifying the study design, population, interventions, and, if applicable, trial acronym                                                                                                                                                                             | __ 1 __                  |
| Trial registration                | 2a      | Trial identifier and registry name. If not yet registered, name of intended registry                                                                                                                                                                                                     | __ 9 __                  |
|                                   | 2b      | All items from the World Health Organization Trial Registration Data Set                                                                                                                                                                                                                 | __ 9 __                  |
| Protocol version                  | 3       | Date and version identifier                                                                                                                                                                                                                                                              | __ NA __                 |
| Funding                           | 4       | Sources and types of financial, material, and other support                                                                                                                                                                                                                              | __ 16 __                 |
| Roles and responsibilities        | 5a      | Names, affiliations, and roles of protocol contributors                                                                                                                                                                                                                                  | __ 1-2, 16 __            |
|                                   | 5b      | Name and contact information for the trial sponsor                                                                                                                                                                                                                                       | __ 16 __                 |
|                                   | 5c      | Role of study sponsor and funders, if any, in study design; collection, management, analysis, and interpretation of data; writing of the report; and the decision to submit the report for publication, including whether they will have ultimate authority over any of these activities | __ 16 __                 |
|                                   | 5d      | Composition, roles, and responsibilities of the coordinating centre, steering committee, endpoint adjudication committee, data management team, and other individuals or groups overseeing the trial, if applicable (see Item 21a for data monitoring committee)                         | __ NA __                 |



1 **Introduction**

2

3 Background and rationale 6a Description of research question and justification for undertaking the trial, including summary of relevant studies (published and unpublished) examining benefits and harms for each intervention \_\_\_ 5-8 \_\_\_

4

5

6 6b Explanation for choice of comparators \_\_\_ NA \_\_\_

7

8 Objectives 7 Specific objectives or hypotheses \_\_\_ 8 \_\_\_

9

10 Trial design 8 Description of trial design including type of trial (eg, parallel group, crossover, factorial, single group), allocation ratio, and framework (eg, superiority, equivalence, noninferiority, exploratory) \_\_\_ 9 \_\_\_

11

12

13

14 **Methods: Participants, interventions, and outcomes**

15

16 Study setting 9 Description of study settings (eg, community clinic, academic hospital) and list of countries where data will be collected. Reference to where list of study sites can be obtained \_\_\_ 9-10 \_\_\_

17

18

19 Eligibility criteria 10 Inclusion and exclusion criteria for participants. If applicable, eligibility criteria for study centres and individuals who will perform the interventions (eg, surgeons, psychotherapists) \_\_\_ 9-10 \_\_\_

20

21

22 Interventions 11a Interventions for each group with sufficient detail to allow replication, including how and when they will be administered \_\_\_ NA \_\_\_

23

24

25 11b Criteria for discontinuing or modifying allocated interventions for a given trial participant (eg, drug dose change in response to harms, participant request, or improving/worsening disease) \_\_\_ NA \_\_\_

26

27

28 11c Strategies to improve adherence to intervention protocols, and any procedures for monitoring adherence (eg, drug tablet return, laboratory tests) \_\_\_ NA \_\_\_

29

30

31 11d Relevant concomitant care and interventions that are permitted or prohibited during the trial \_\_\_ NA \_\_\_

32

33

34 Outcomes 12 Primary, secondary, and other outcomes, including the specific measurement variable (eg, systolic blood pressure), analysis metric (eg, change from baseline, final value, time to event), method of aggregation (eg, median, proportion), and time point for each outcome. Explanation of the clinical relevance of chosen efficacy and harm outcomes is strongly recommended \_\_\_ 10-11, 20 \_\_\_

35

36

37

38

39

40 Participant timeline 13 Time schedule of enrolment, interventions (including any run-ins and washouts), assessments, and visits for participants. A schematic diagram is highly recommended (see Figure) \_\_\_ 11-13 \_\_\_

41

42

43

44

45

46

1 Sample size 14 Estimated number of participants needed to achieve study objectives and how it was determined, including \_\_\_\_\_10-11\_\_\_\_\_

2 clinical and statistical assumptions supporting any sample size calculations

3

4 Recruitment 15 Strategies for achieving adequate participant enrolment to reach target sample size \_\_\_\_\_10-11\_\_\_\_\_

5

6 **Methods: Assignment of interventions (for controlled trials)**

7

8 Allocation:

9

10 Sequence 16a Method of generating the allocation sequence (eg, computer-generated random numbers), and list of any \_\_\_\_\_NA\_\_\_\_\_

11 generation factors for stratification. To reduce predictability of a random sequence, details of any planned restriction

12 (eg, blocking) should be provided in a separate document that is unavailable to those who enrol participants

13 or assign interventions

14

15

16 Allocation 16b Mechanism of implementing the allocation sequence (eg, central telephone; sequentially numbered, \_\_\_\_\_NA\_\_\_\_\_

17 concealment opaque, sealed envelopes), describing any steps to conceal the sequence until interventions are assigned

18 mechanism

19

20 Implementation 16c Who will generate the allocation sequence, who will enrol participants, and who will assign participants to \_\_\_\_\_NA\_\_\_\_\_

21 interventions

22

23

24 Blinding (masking) 17a Who will be blinded after assignment to interventions (eg, trial participants, care providers, outcome \_\_\_\_\_NA\_\_\_\_\_

25 assessors, data analysts), and how

26

27 17b If blinded, circumstances under which unblinding is permissible, and procedure for revealing a participant's \_\_\_\_\_NA\_\_\_\_\_

28 allocated intervention during the trial

29

30

31 **Methods: Data collection, management, and analysis**

32

33 Data collection 18a Plans for assessment and collection of outcome, baseline, and other trial data, including any related \_\_\_\_\_11-13\_\_\_\_\_

34 methods processes to promote data quality (eg, duplicate measurements, training of assessors) and a description of

35 study instruments (eg, questionnaires, laboratory tests) along with their reliability and validity, if known.

36 Reference to where data collection forms can be found, if not in the protocol

37

38

39 18b Plans to promote participant retention and complete follow-up, including list of any outcome data to be \_\_\_\_\_NA\_\_\_\_\_

40 collected for participants who discontinue or deviate from intervention protocols

41

42

|    |                                 |     |                                                                                                                                                                                                                                                                                                                                       |                   |
|----|---------------------------------|-----|---------------------------------------------------------------------------------------------------------------------------------------------------------------------------------------------------------------------------------------------------------------------------------------------------------------------------------------|-------------------|
| 1  | Data management                 | 19  | Plans for data entry, coding, security, and storage, including any related processes to promote data quality (eg, double data entry; range checks for data values). Reference to where details of data management procedures can be found, if not in the protocol                                                                     | ___ 11-13 ___     |
| 2  |                                 |     |                                                                                                                                                                                                                                                                                                                                       |                   |
| 3  |                                 |     |                                                                                                                                                                                                                                                                                                                                       |                   |
| 4  |                                 |     |                                                                                                                                                                                                                                                                                                                                       |                   |
| 5  | Statistical methods             | 20a | Statistical methods for analysing primary and secondary outcomes. Reference to where other details of the statistical analysis plan can be found, if not in the protocol                                                                                                                                                              | ___ 11-13 ___     |
| 6  |                                 |     |                                                                                                                                                                                                                                                                                                                                       |                   |
| 7  |                                 |     |                                                                                                                                                                                                                                                                                                                                       |                   |
| 8  |                                 | 20b | Methods for any additional analyses (eg, subgroup and adjusted analyses)                                                                                                                                                                                                                                                              | ___ NA ___        |
| 9  |                                 |     |                                                                                                                                                                                                                                                                                                                                       |                   |
| 10 |                                 | 20c | Definition of analysis population relating to protocol non-adherence (eg, as randomised analysis), and any statistical methods to handle missing data (eg, multiple imputation)                                                                                                                                                       | ___ NA ___        |
| 11 |                                 |     |                                                                                                                                                                                                                                                                                                                                       |                   |
| 12 |                                 |     |                                                                                                                                                                                                                                                                                                                                       |                   |
| 13 |                                 |     |                                                                                                                                                                                                                                                                                                                                       |                   |
| 14 | <b>Methods: Monitoring</b>      |     |                                                                                                                                                                                                                                                                                                                                       |                   |
| 15 |                                 |     |                                                                                                                                                                                                                                                                                                                                       |                   |
| 16 | Data monitoring                 | 21a | Composition of data monitoring committee (DMC); summary of its role and reporting structure; statement of whether it is independent from the sponsor and competing interests; and reference to where further details about its charter can be found, if not in the protocol. Alternatively, an explanation of why a DMC is not needed | ___ 12, 13 ___    |
| 17 |                                 |     |                                                                                                                                                                                                                                                                                                                                       |                   |
| 18 |                                 |     |                                                                                                                                                                                                                                                                                                                                       |                   |
| 19 |                                 |     |                                                                                                                                                                                                                                                                                                                                       |                   |
| 20 |                                 |     |                                                                                                                                                                                                                                                                                                                                       |                   |
| 21 |                                 |     |                                                                                                                                                                                                                                                                                                                                       |                   |
| 22 |                                 | 21b | Description of any interim analyses and stopping guidelines, including who will have access to these interim results and make the final decision to terminate the trial                                                                                                                                                               | ___ 12 ___        |
| 23 |                                 |     |                                                                                                                                                                                                                                                                                                                                       |                   |
| 24 |                                 |     |                                                                                                                                                                                                                                                                                                                                       |                   |
| 25 | Harms                           | 22  | Plans for collecting, assessing, reporting, and managing solicited and spontaneously reported adverse events and other unintended effects of trial interventions or trial conduct                                                                                                                                                     | ___ NA ___        |
| 26 |                                 |     |                                                                                                                                                                                                                                                                                                                                       |                   |
| 27 |                                 |     |                                                                                                                                                                                                                                                                                                                                       |                   |
| 28 | Auditing                        | 23  | Frequency and procedures for auditing trial conduct, if any, and whether the process will be independent from investigators and the sponsor                                                                                                                                                                                           | ___ NA ___        |
| 29 |                                 |     |                                                                                                                                                                                                                                                                                                                                       |                   |
| 30 |                                 |     |                                                                                                                                                                                                                                                                                                                                       |                   |
| 31 |                                 |     |                                                                                                                                                                                                                                                                                                                                       |                   |
| 32 | <b>Ethics and dissemination</b> |     |                                                                                                                                                                                                                                                                                                                                       |                   |
| 33 |                                 |     |                                                                                                                                                                                                                                                                                                                                       |                   |
| 34 | Research ethics approval        | 24  | Plans for seeking research ethics committee/institutional review board (REC/IRB) approval                                                                                                                                                                                                                                             | ___ 3, 10, 16 ___ |
| 35 |                                 |     |                                                                                                                                                                                                                                                                                                                                       |                   |
| 36 |                                 |     |                                                                                                                                                                                                                                                                                                                                       |                   |
| 37 | Protocol amendments             | 25  | Plans for communicating important protocol modifications (eg, changes to eligibility criteria, outcomes, analyses) to relevant parties (eg, investigators, REC/IRBs, trial participants, trial registries, journals, regulators)                                                                                                      | ___ NA ___        |
| 38 |                                 |     |                                                                                                                                                                                                                                                                                                                                       |                   |
| 39 |                                 |     |                                                                                                                                                                                                                                                                                                                                       |                   |
| 40 |                                 |     |                                                                                                                                                                                                                                                                                                                                       |                   |
| 41 |                                 |     |                                                                                                                                                                                                                                                                                                                                       |                   |
| 42 |                                 |     |                                                                                                                                                                                                                                                                                                                                       |                   |
| 43 |                                 |     |                                                                                                                                                                                                                                                                                                                                       |                   |
| 44 |                                 |     |                                                                                                                                                                                                                                                                                                                                       |                   |
| 45 |                                 |     |                                                                                                                                                                                                                                                                                                                                       |                   |
| 46 |                                 |     |                                                                                                                                                                                                                                                                                                                                       |                   |

|    |                               |     |                                                                                                                                                                                                                                                                                     |                          |
|----|-------------------------------|-----|-------------------------------------------------------------------------------------------------------------------------------------------------------------------------------------------------------------------------------------------------------------------------------------|--------------------------|
| 1  | Consent or assent             | 26a | Who will obtain informed consent or assent from potential trial participants or authorised surrogates, and how (see Item 32)                                                                                                                                                        | ___ NA ___               |
| 2  |                               |     |                                                                                                                                                                                                                                                                                     |                          |
| 3  |                               |     |                                                                                                                                                                                                                                                                                     |                          |
| 4  |                               | 26b | Additional consent provisions for collection and use of participant data and biological specimens in ancillary studies, if applicable                                                                                                                                               | ___ NA ___               |
| 5  |                               |     |                                                                                                                                                                                                                                                                                     |                          |
| 6  |                               |     |                                                                                                                                                                                                                                                                                     |                          |
| 7  | Confidentiality               | 27  | How personal information about potential and enrolled participants will be collected, shared, and maintained in order to protect confidentiality before, during, and after the trial                                                                                                | ___ 11-13 ___            |
| 8  |                               |     |                                                                                                                                                                                                                                                                                     |                          |
| 9  |                               |     |                                                                                                                                                                                                                                                                                     |                          |
| 10 | Declaration of interests      | 28  | Financial and other competing interests for principal investigators for the overall trial and each study site                                                                                                                                                                       | ___ 16 ___               |
| 11 |                               |     |                                                                                                                                                                                                                                                                                     |                          |
| 12 |                               |     |                                                                                                                                                                                                                                                                                     |                          |
| 13 | Access to data                | 29  | Statement of who will have access to the final trial dataset, and disclosure of contractual agreements that limit such access for investigators                                                                                                                                     | ___ 13 ___               |
| 14 |                               |     |                                                                                                                                                                                                                                                                                     |                          |
| 15 |                               |     |                                                                                                                                                                                                                                                                                     |                          |
| 16 | Ancillary and post-trial care | 30  | Provisions, if any, for ancillary and post-trial care, and for compensation to those who suffer harm from trial participation                                                                                                                                                       | ___ NA ___               |
| 17 |                               |     |                                                                                                                                                                                                                                                                                     |                          |
| 18 |                               |     |                                                                                                                                                                                                                                                                                     |                          |
| 19 |                               |     |                                                                                                                                                                                                                                                                                     |                          |
| 20 | Dissemination policy          | 31a | Plans for investigators and sponsor to communicate trial results to participants, healthcare professionals, the public, and other relevant groups (eg, via publication, reporting in results databases, or other data sharing arrangements), including any publication restrictions | ___ 3, 14 ___            |
| 21 |                               |     |                                                                                                                                                                                                                                                                                     |                          |
| 22 |                               |     |                                                                                                                                                                                                                                                                                     |                          |
| 23 |                               |     |                                                                                                                                                                                                                                                                                     |                          |
| 24 |                               | 31b | Authorship eligibility guidelines and any intended use of professional writers                                                                                                                                                                                                      | ___ NA ___               |
| 25 |                               |     |                                                                                                                                                                                                                                                                                     |                          |
| 26 |                               | 31c | Plans, if any, for granting public access to the full protocol, participant-level dataset, and statistical code                                                                                                                                                                     | ___ NA ___               |
| 27 |                               |     |                                                                                                                                                                                                                                                                                     |                          |
| 28 |                               |     |                                                                                                                                                                                                                                                                                     |                          |
| 29 | <b>Appendices</b>             |     |                                                                                                                                                                                                                                                                                     |                          |
| 30 |                               |     |                                                                                                                                                                                                                                                                                     |                          |
| 31 | Informed consent materials    | 32  | Model consent form and other related documentation given to participants and authorised surrogates                                                                                                                                                                                  | ___ 10, Suppl file 3 ___ |
| 32 |                               |     |                                                                                                                                                                                                                                                                                     |                          |
| 33 |                               |     |                                                                                                                                                                                                                                                                                     |                          |
| 34 | Biological specimens          | 33  | Plans for collection, laboratory evaluation, and storage of biological specimens for genetic or molecular analysis in the current trial and for future use in ancillary studies, if applicable                                                                                      | ___ NA ___               |
| 35 |                               |     |                                                                                                                                                                                                                                                                                     |                          |
| 36 |                               |     |                                                                                                                                                                                                                                                                                     |                          |

\*It is strongly recommended that this checklist be read in conjunction with the SPIRIT 2013 Explanation & Elaboration for important clarification on the items. Amendments to the protocol should be tracked and dated. The SPIRIT checklist is copyrighted by the SPIRIT Group under the Creative Commons "[Attribution-NonCommercial-NoDerivs 3.0 Unported](https://creativecommons.org/licenses/by-nc-nd/3.0/)" license.

## HSCP team intervention in the ED

**Supplementary File 2 – Adaptation evaluation form**

Evaluation form for trial adaptations (based on Stirman et al., 2013)

| Dimension                                                         | Description |
|-------------------------------------------------------------------|-------------|
| WHAT was modified?                                                |             |
| - Content                                                         |             |
| - Context                                                         |             |
| If content modification, what was the nature of the modification? |             |
| - Tailoring/tweaking/refining                                     |             |
| - Adding elements                                                 |             |
| - Removing/skipping elements                                      |             |
| - Shortening                                                      |             |
| - Lengthening                                                     |             |
| - Substituting                                                    |             |
| - Reordering of segments                                          |             |
| - Integrating intervention into different framework               |             |
| - Integrating another treatment                                   |             |
| - Repeating elements                                              |             |
| - Loosening structure                                             |             |
| - Departing from intervention                                     |             |
| If context modification, which of the following apply?            |             |
| - Format                                                          |             |
| - Setting                                                         |             |
| - Personnel                                                       |             |
| - Population                                                      |             |
| By WHOM were modifications made?                                  |             |
| - Individual practitioner/facilitator                             |             |
| - Team                                                            |             |
| - Non-program staff                                               |             |
| - Administration                                                  |             |
| - Program developer                                               |             |
| - Researcher                                                      |             |
| - Coalition of stakeholders                                       |             |
| - Unknown/unspecified                                             |             |
| At what LEVEL OF DELIVERY?                                        |             |
| - Individual patient level                                        |             |
| - Group level                                                     |             |
| - Individual practitioner level                                   |             |
| - Clinic/unit level                                               |             |
| - Hospital level                                                  |             |
| - Network level                                                   |             |
| - System level                                                    |             |

1  
2  
3 HSCP team ED intervention – Process evaluation protocol  
4  
5

6 **Supplementary File 3 – Interview schedule**  
7  
8  
9

10  
11 Trial clinical team (40-60 minutes focus group)  
12  
13

14  
15 **Implementation**  
16

- 17  
18 1. Tell me about the preparation phase prior to implementation of the trial: What  
19 types of activities were carried to prepare for the trial?  
20  
21  
22 2. Could you describe a typical day of the intervention?  
23  
24  
25 3. Do you think that the implementation was carried as planned or were there  
26 adaptations made? If so, which?  
27  
28  
29 4. How did you feel about the recruitment part of the trial?  
30  
31

32 **Mechanisms**  
33

- 34  
35 5. How do you think the patients felt about being involved in the intervention?  
36  
37  
38 6. How do you think other staff members felt about the intervention?  
39  
40  
41 7. What, in your opinion, worked well in the intervention and what might have  
42 worked better?  
43  
44  
45 8. Do you recall anything unexpected occurring during the intervention that might  
46 have influenced its implementation?  
47  
48

49 **Context**  
50

- 51  
52 9. What factors external to the intervention do you think have influenced its  
53 implementation?  
54  
55

56  
57 **Recommendations for future practice**  
58  
59  
60

- 1  
2  
3 10. What recommendations would you make should the intervention be considered for  
4  
5 other emergency departments in the future?  
6  
7  
8  
9

11 Other staff members (focus group or 1:1 interview)  
12  
13

14 Implementation  
15  
16

- 17 1. How were you informed or came to know about the OPTIMEND intervention?  
18  
19 2. If you were working in the ED during the intervention, how would you describe  
20 your interaction with the OPTIMEND team?  
21  
22  
23  
24

25 Mechanisms  
26  
27

- 28 3. How do you think the patients felt about being involved in the intervention?  
29  
30 4. How do you think other staff members felt about the intervention?  
31  
32 5. What, in your opinion, worked well in the intervention and what might have  
33 worked better?  
34  
35 6. Do you recall anything unexpected occurring during the intervention that might  
36 have influenced its implementation?  
37  
38  
39  
40  
41

42 Context  
43  
44

- 45 7. What factors external to the intervention do you think have influenced its  
46 implementation?  
47  
48  
49

50 Recommendations for future practice  
51  
52

- 53 8. What recommendations would you make should the intervention be considered for  
54 other emergency departments in the future?  
55  
56  
57  
58  
59  
60
