# Supplementary material for: Implementing an allied health team intervention to improve the care of older adults in the emergency department: protocol for a process evaluation
Source: PubMed Central journal article supplement — BMJ Open. 2019 Jul 16;9(7):e032645. doi: 10.1136/bmjopen-2019-032645 (PMC6661884; doi:10.1136/bmjopen-2019-032645), 2019-07-16
Supplement: bmjopen-2019-032645.reviewer_comments.pdf [file bmjopen-2019-032645.reviewer_comments.pdf]

## PEER REVIEW HISTORY

BMJ Open publishes all reviews undertaken for accepted manuscripts. Reviewers are asked to complete a checklist review form (<http://bmjopen.bmj.com/site/about/resources/checklist.pdf>) and are provided with free text boxes to elaborate on their assessment. These free text comments are reproduced below.

## ARTICLE DETAILS

|                            |                                                                                                                                                                              |
|----------------------------|------------------------------------------------------------------------------------------------------------------------------------------------------------------------------|
| <b>TITLE (PROVISIONAL)</b> | Implementing an Allied Health Team Intervention to Improve the Care of Older Adults in the Emergency Department: Protocol for a Process Evaluation                           |
| <b>AUTHORS</b>             | Cassarino, Marica; Cronin, Úna; Robinson, Katie; Quinn, Rosie; Boland, Fiona; Ward, Marie; MacNamara, Rosa; O'Connor, Margaret; McCarthy, Gerard; Ryan, Damien; Galvin, Rose |

This article was not externally reviewed at BMJ Open. Protocols that have been independently assessed prior to submission to BMJ Open are usually fast-tracked to publication on the grounds that further substantial changes will not be possible. This independent assessment will usually be external, independent review for both a substantial grant award from a non-commercial or government funder and ethics approval.
