# Supplementary material for: Implementing an allied health team intervention to improve the care of older adults in the emergency department: protocol for a process evaluation
Source: PubMed Central journal article supplement — BMJ Open. 2019 Jul 16;9(7):e032645. doi: 10.1136/bmjopen-2019-032645 (PMC6661884; doi:10.1136/bmjopen-2019-032645), 2019-07-16
Supplement: bmjopen-2019-032645supp002.pdf [file bmjopen-2019-032645supp002.pdf]

HSCP team intervention in the ED

**Supplementary File 2 – Adaptation evaluation form**

Evaluation form for trial adaptations (based on Stirman et al., 2013)

| Dimension                                                                                                                                                                                                                                                                                                                                                                                                                                            | Description |
|------------------------------------------------------------------------------------------------------------------------------------------------------------------------------------------------------------------------------------------------------------------------------------------------------------------------------------------------------------------------------------------------------------------------------------------------------|-------------|
| WHAT was modified?                                                                                                                                                                                                                                                                                                                                                                                                                                   |             |
| <ul style="list-style-type: none"><li>- Content</li><li>- Context</li></ul>                                                                                                                                                                                                                                                                                                                                                                          |             |
| If content modification, what was the nature of the modification?                                                                                                                                                                                                                                                                                                                                                                                    |             |
| <ul style="list-style-type: none"><li>- Tailoring/tweaking/refining</li><li>- Adding elements</li><li>- Removing/skipping elements</li><li>- Shortening</li><li>- Lengthening</li><li>- Substituting</li><li>- Reordering of segments</li><li>- Integrating intervention into different framework</li><li>- Integrating another treatment</li><li>- Repeating elements</li><li>- Loosening structure</li><li>- Departing from intervention</li></ul> |             |
| If context modification, which of the following apply?                                                                                                                                                                                                                                                                                                                                                                                               |             |
| <ul style="list-style-type: none"><li>- Format</li><li>- Setting</li><li>- Personnel</li><li>- Population</li></ul>                                                                                                                                                                                                                                                                                                                                  |             |
| By WHOM were modifications made?                                                                                                                                                                                                                                                                                                                                                                                                                     |             |
| <ul style="list-style-type: none"><li>- Individual practitioner/facilitator</li><li>- Team</li><li>- Non-program staff</li><li>- Administration</li><li>- Program developer</li><li>- Researcher</li><li>- Coalition of stakeholders</li><li>- Unknown/unspecified</li></ul>                                                                                                                                                                         |             |
| At what LEVEL OF DELIVERY?                                                                                                                                                                                                                                                                                                                                                                                                                           |             |
| <ul style="list-style-type: none"><li>- Individual patient level</li><li>- Group level</li><li>- Individual practitioner level</li><li>- Clinic/unit level</li><li>- Hospital level</li><li>- Network level</li><li>- System level</li></ul>                                                                                                                                                                                                         |             |
