# Supplementary material for: Implementing an allied health team intervention to improve the care of older adults in the emergency department: protocol for a process evaluation
Source: PubMed Central journal article supplement — BMJ Open. 2019 Jul 16;9(7):e032645. doi: 10.1136/bmjopen-2019-032645 (PMC6661884; doi:10.1136/bmjopen-2019-032645), 2019-07-16
Supplement: bmjopen-2019-032645supp003.pdf [file bmjopen-2019-032645supp003.pdf]

**Supplementary File 3 – Interview schedule**

Trial clinical team (40-60 minutes focus group)

Implementation

1. Tell me about the preparation phase prior to implementation of the trial: What types of activities were carried to prepare for the trial?
2. Could you describe a typical day of the intervention?
3. Do you think that the implementation was carried as planned or were there adaptations made? If so, which?
4. How did you feel about the recruitment part of the trial?

Mechanisms

5. How do you think the patients felt about being involved in the intervention?
6. How do you think other staff members felt about the intervention?
7. What, in your opinion, worked well in the intervention and what might have worked better?
8. Do you recall anything unexpected occurring during the intervention that might have influenced its implementation?

Context

9. What factors external to the intervention do you think have influenced its implementation?

Recommendations for future practice

10. What recommendations would you make should the intervention be considered for other emergency departments in the future?

Other staff members (focus group or 1:1 interview)

Implementation

1. How were you informed or came to know about the OPTIMEND intervention?
2. If you were working in the ED during the intervention, how would you describe your interaction with the OPTIMEND team?

Mechanisms

3. How do you think the patients felt about being involved in the intervention?
4. How do you think other staff members felt about the intervention?
5. What, in your opinion, worked well in the intervention and what might have worked better?
6. Do you recall anything unexpected occurring during the intervention that might have influenced its implementation?

Context

7. What factors external to the intervention do you think have influenced its implementation?

Recommendations for future practice

8. What recommendations would you make should the intervention be considered for other emergency departments in the future?
